# Supplementary material
Source: PubMed Central journal article supplement (PMC2720765)
Supplement: djn365_1.pdf [file djn365_1.pdf]

## Supplemental Data

**Supplemental Figure 1.** Ectopic SIAH-2<sup>WT</sup> expression on 20-Gy radiation- and serum starvation-mediated cell cycle arrest. Ectopic expression of SIAH-2<sup>WT</sup> is not sufficient to rescue cell cycle arrest induced by lethal radiation (20-Gy) or serum starvation in the A549 cells. (A) Cell cycle analysis. DNA flow cytometric analysis was performed in A549 cells infected with mock, pLenti-GFP or pLenti-SIAH-2<sup>WT</sup> viruses. At 48 hours post infection, A549 cells were radiated (20Gy) or serum starved for 36 hours and cell cycle profiles were analyzed by flow cytometry. The percentages of cells in G<sub>0</sub>-G<sub>1</sub>, S and G<sub>2</sub>-M phase were calculated using Modfit LT 3.0 computer software and are represented in the histograms. The experiments were repeated two times and similar results were obtained. Representative cell cycle profiles are shown. (B) Immunoblot analysis. Western blot analysis was performed using total cell lysates (20 µg) of pLentiviral infected A549 cells. The results showed that SIAH-2<sup>WT</sup> is expressed in A549 cells as indicated by FLAG immunoblot. The phospho-ERK activity was examined post infection, radiation and serum starvation and ERK2 expression was used as an internal control.

**Supplemental Figure 2: SIAH-2 deficiency reduces ERK signaling, inhibits cell proliferation, induces apoptosis and compromises anchorage-independent tumor growth in soft agar in UMC 11 cells with wild-type RAS.**

UMC11 cells were either mock infected or infected with pLenti-GFP, pLenti-SIAH-2<sup>WT</sup>-GFP or pLenti-SIAH-2<sup>PD</sup>-GFP viruses. (A) Live cell imaging. The GFP and bright field images of untreated and pLentiviral-infected UMC11 cells expressing either GFP, SIAH-2<sup>WT</sup>-GFP or SIAH-2<sup>PD</sup>-GFP heterogeneously are shown at 3 days post-infection. The pLentiviral infection rate was close to 95%. (B) Western blot analysis. Total cell lysates (15 µg) were collected at day 3 post infection from UMC 11 cells treated with the above lentiviruses. SIAH expression and phospho-ERK activity were examined in the infected UMC 11 cells by Western blot analyses. ERK2 expression level was used as internal loading control. Note that SIAH-2<sup>PD</sup> expression leads to a

marked reduction in phospho-ERK expression in UMC11 cells. **(C)** Colony formation in soft agar. SIAH deficiency inhibits anchorage-independent tumor growth in soft agar in UMC 11 cells, another lung cancer cell line carrying wild type RAS. Two hundred UMC 11 cells infected with the indicated lentiviruses were plated into a 24-well plate in triplicate with a layer of 0.08% low-melting agarose. At day 14, every colony formed in soft agar was counted. A bar graph representation of the results is shown. Error bars represent 95% confidence intervals. Comparison between groups was performed by Student's *t* test. \* statistically significant increase in the percentage of TUNEL-positive cells was observed in SIAH-2 deficient A549 cells ( $P < .001$ ). **(D)** Cell proliferation assays. UMC11 cells were either mock infected or infected with pLenti-shRNA-control or pLenti-shRNA-SIAH-2 #6 viruses. The cell proliferation rates were markedly reduced in UMC11 cells infected with the pLenti-shRNA-SIAH-2 knockdown virus (#6) as compared to control viruses. Error bars represent 95% confidence intervals. Comparison between groups was performed using Student's *t* test. \* statistically significant reductions in cell proliferation were observed in SIAH-deficient UMC11 tumors (shRNA-SIAH-2 #6) as compared to either untreated UMC11 cells as a referent group ( $P < .001$ ) or compared to the SIAH-proficient tumors (shRNA control) as a referent group ( $P < .001$ ). **(E)** SIAH-2<sup>PD</sup>-dependent cytotoxicity in UMC11 cells 3-days post infection.

### **Supplemental Figure 3: A549 tumor histology**

Histology was performed on the large and small A549 tumors resected from nude mice. A549 cells were mock-infected, heterogeneously infected with either eGFP or SIAH<sub>2</sub><sup>PD</sup>-eGFP lentiviruses and injected into nude mice. H&E was used to view the tissue morphology of A549 tumors resected from the nude mice. Human cells are bigger in size and have bigger nuclei than mouse cells. Anti-SIAH mAb (24E6) stains human cells but not the surrounding mouse cells. Anti-vWF antibodies stain both large and small tumors. Immunochemical staining of cell nuclei (**Blue**) and SIAH and vWF (**Brown**) are represented in photo images.

**Supplementary Table 1.** Cell proliferation rates of SIAH-2-proficient versus SIAH-2-deficient lung epithelial cells\*

| Cell line, treatment                 | Day 5 post infection                      |          |          | Day 6 post infection                      |          |          | Day 7 post infection                      |          |          |
|--------------------------------------|-------------------------------------------|----------|----------|-------------------------------------------|----------|----------|-------------------------------------------|----------|----------|
|                                      | Mean no. of cells, $\times 10^3$ (95% CI) | <i>P</i> | <i>P</i> | Mean no. of cells, $\times 10^3$ (95% CI) | <i>P</i> | <i>P</i> | Mean no. of cells, $\times 10^3$ (95% CI) | <i>P</i> | <i>P</i> |
| <b>BEAS</b>                          |                                           |          |          |                                           |          |          |                                           |          |          |
| Untreated                            | 152 (116 to 188)                          | Referent | .72      | 284 (140 to 428)                          | Referent | .15      | 710 (476 to 945)                          | Referent | .042     |
| Non-target shRNA                     | 159 (93 to 225)                           | .72      | Referent | 213 (119 to 308)                          | .15      | Referent | 488 (263 to 713)                          | .042     | Referent |
| shRNA SIAH-2 #6                      | 145 (108 to 183)                          | .61      | .49      | 195 (145 to 245)                          | .06      | .49      | 577 (183 to 972)                          | .26      | .45      |
|                                      |                                           |          |          |                                           |          |          |                                           |          |          |
| Untreated                            | 23 (12 to 34)                             | Referent | .052     | 66 (57 to 74)                             | Referent | <.001    | 54 (35 to 72)                             | Referent | 0.081    |
| GFP lentivirus                       | 34 (27 to 40)                             | .052     | Referent | 24 (9 to 39)                              | <.001    | Referent | 38 (28 to 49)                             | .081     | Referent |
| SIAH-2 <sup>PD</sup> -GFP lentivirus | 18 (4 to 33)                              | .478     | .028     | 33 (31 to 35)                             | <.001    | .153     | 40 (34 to 46)                             | .084     | .731     |
| <b>BZR</b>                           |                                           |          |          |                                           |          |          |                                           |          |          |
| Untreated                            | 152 (116 to 188)                          | Referent | .72      | 439 (389 to 489)                          | Referent | .01      | 771 (646 to 896)                          | Referent | .002     |
| Non-target shRNA                     | 159 (93 to 225)                           | .72      | Referent | 370 (300 to 420)                          | .01      | Referent | 528 (475 to 580)                          | .002     | Referent |
| shRNA SIAH-2 #6                      | 145 (108 to 183)                          | .62      | .49      | 57 (22 to 92)                             | <.001    | <.001    | 45 (30 to 60)                             | <.001    | <.001    |
|                                      |                                           |          |          |                                           |          |          |                                           |          |          |
| Untreated                            | 150 (97 to 202)                           | Referent | .039     | 118 (97 to 140)                           | Referent | .43      | 172 (135 to 209)                          | Referent | .222     |
| GFP lentivirus                       | 89 (44 to 133)                            | .039     | Referent | 96 (82 to 110)                            | 0.43     | Referent | 159 (137 to 169)                          | .222     | Referent |
| SIAH-2 <sup>PD</sup> -GFP lentivirus | 80 (52 to 127)                            | .033     | .971     | 63 (46 to 81)                             | 0.001    | .004     | 67 (29 to 85)                             | .001     | .001     |
| <b>A549</b>                          |                                           |          |          |                                           |          |          |                                           |          |          |
| Untreated                            | 444 (194 to 694)                          | Referent | .04      | 1001 (252 to 1749)                        | Referent | .69      | 2301 (1087 to 3514)                       | Referent | 0.33     |
| Non-target shRNA                     | 752 (404 to 1100)                         | .04      | Referent | 1107 (304 to 1910)                        | .69      | Referent | 1883 (798 to 2969)                        | .33      | Referent |
| shRNA SIAH-2 #6                      | 14 (3 to 26)                              | .002     | .001     | 8 (0 to 25)                               | .005     | .004     | 19 (0 to 47)                              | .001     | .002     |
|                                      |                                           |          |          |                                           |          |          |                                           |          |          |
| Untreated                            | 320 (265 to 375)                          | Referent | .945     | 476 (362 to 589)                          | Referent | .006     | 605 (424 to 785)                          | Referent | .688     |
| GFP lentivirus                       | 322 (246 to 398)                          | 0.945    | Referent | 657 (587 to 727)                          | 0.006    | Referent | 578 (559 to 596)                          | .688     | Referent |
| SIAH-2 <sup>PD</sup> -GFP lentivirus | 57 (22 to 92)                             | <.001    | <.001    | 544 (33 to 75)                            | <.001    | <.001    | 101 (89 to 112)                           | <.001    | <.001    |
| <b>H727</b>                          |                                           |          |          |                                           |          |          |                                           |          |          |
| Untreated                            | 308 (174 to 442)                          | Referent | .21      | 544 (182 to 906)                          | Referent | .55      | 1220 (528 to 1920)                        | Referent | .07      |
| Non-target shRNA                     | 372 (243 to 501)                          | .21      | Referent | 624 (253 to 1010)                         | .55      | Referent | 784 (438 to 1130)                         | .07      | Referent |
| shRNA SIAH-2 #6                      | 16 (3 to 36)                              | .001     | .001     | 13 (8 to 19)                              | .003     | .002     | 8 (0 to 25)                               | .002     | .001     |
|                                      |                                           |          |          |                                           |          |          |                                           |          |          |
| Untreated                            | 268 (206 to 330)                          | Referent | .901     | 337 (296 to 377)                          | Referent | .159     | 443 (418 to 469)                          | Referent | .005     |
| GFP lentivirus                       | 271 (228 to 315)                          | .901     | Referent | 299 (254 to 353)                          | .159     | Referent | 365 (314 to 416)                          | .005     | Referent |
| SIAH-2 <sup>PD</sup> -GFP lentivirus | 126 (79 to 173)                           | .001     | .001     | 104 (71 to 138)                           | <.001    | <.001    | 130 (82 to 177)                           | <.001    | <.001    |

A panel of human normal lung epithelial cells, BEAS-2B, lung tumor cells, BZR, and the lung cancer cells A549 and H727 were mock infected or infected with pLenti-GFP, pLenti-SIAH-2<sup>PD</sup>-GFP, pLenti-shRNA-control, or pLenti-shRNA-SIAH-2 #6 viruses using an infection ratio (viruses:cells) of 20:1. Cell proliferation assay was performed for each cell line under each infection condition in which 10000 infected cells were plated into each well of a total of 72 wells under each infection condition in triplicates. The total number of cells per well was manually counted over a 7–8-day period post infection. CI = confidence interval; shRNA = short hairpin RNA; GFP = green fluorescent protein; PD = protease deficient. *P* values were generated using the Unpaired two-sided Student *t*-test.
