# Supplementary material
Source: PubMed Central journal article supplement (PMC2720765)

**(-) Control****Radiation (20 Gy)****Serum Starvation****Mock**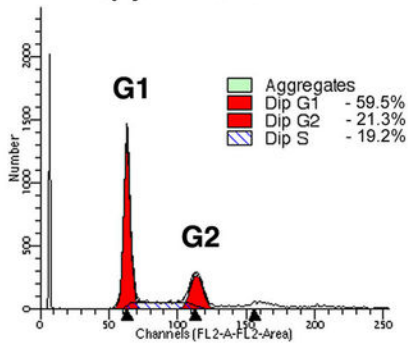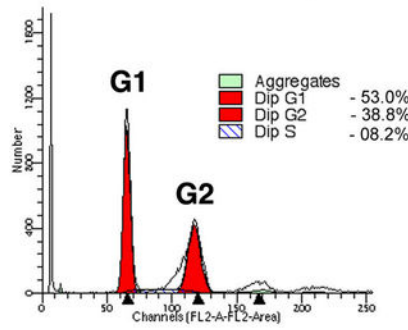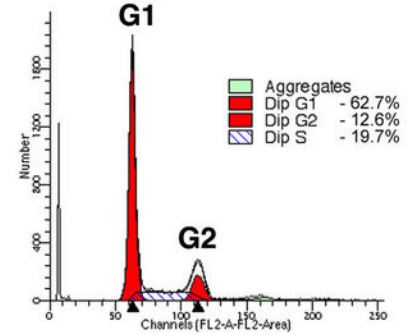**pLenti-GFP**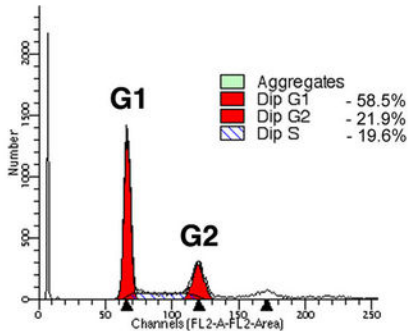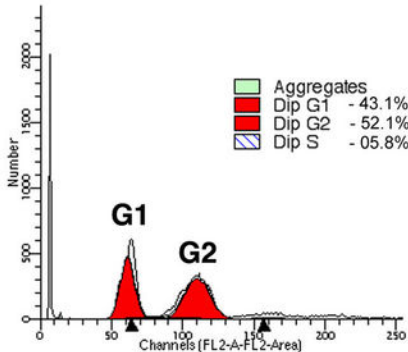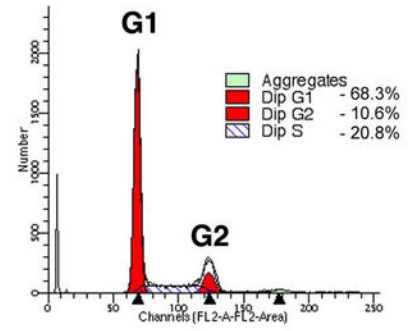**pLenti-SIAH<sub>2</sub><sup>WT</sup>**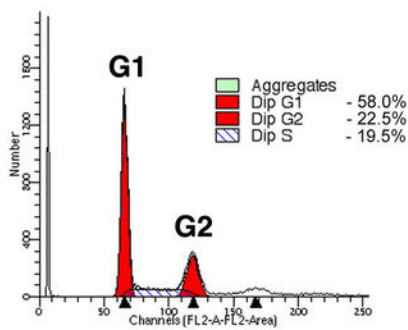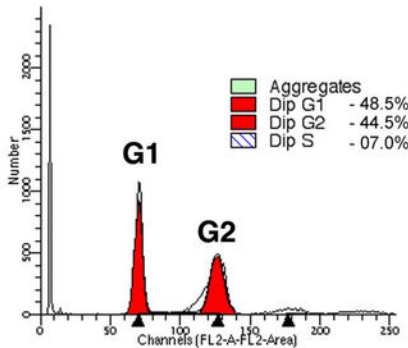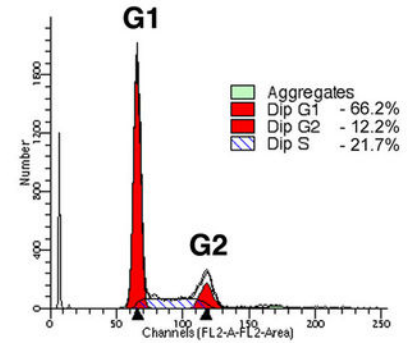**(-) Control****(+) Radiation****(-) Serum**

| (-) Control |     |                                 | (+) Radiation |     |                                 | (-) Serum |     |                                 |
|-------------|-----|---------------------------------|---------------|-----|---------------------------------|-----------|-----|---------------------------------|
| Mock        | GFP | SIAH <sub>2</sub> <sup>WT</sup> | Mock          | GFP | SIAH <sub>2</sub> <sup>WT</sup> | Mock      | GFP | SIAH <sub>2</sub> <sup>WT</sup> |

**α-FLAG**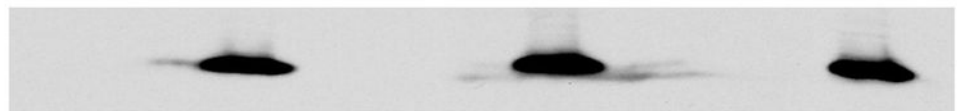**α-phospho-ERK**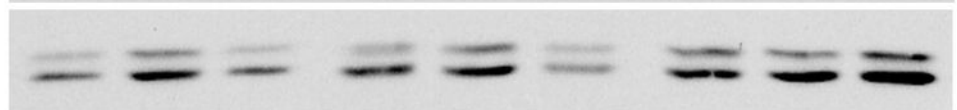**α-ERK2**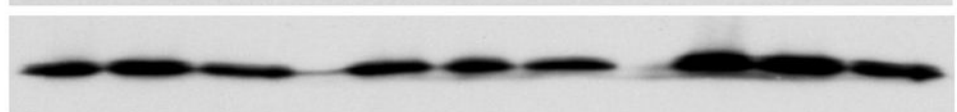

Supplement: djn365_2.pdf [file djn365_2.pdf]
