# Supplementary material
Source: PubMed Central journal article supplement (PMC2720765)

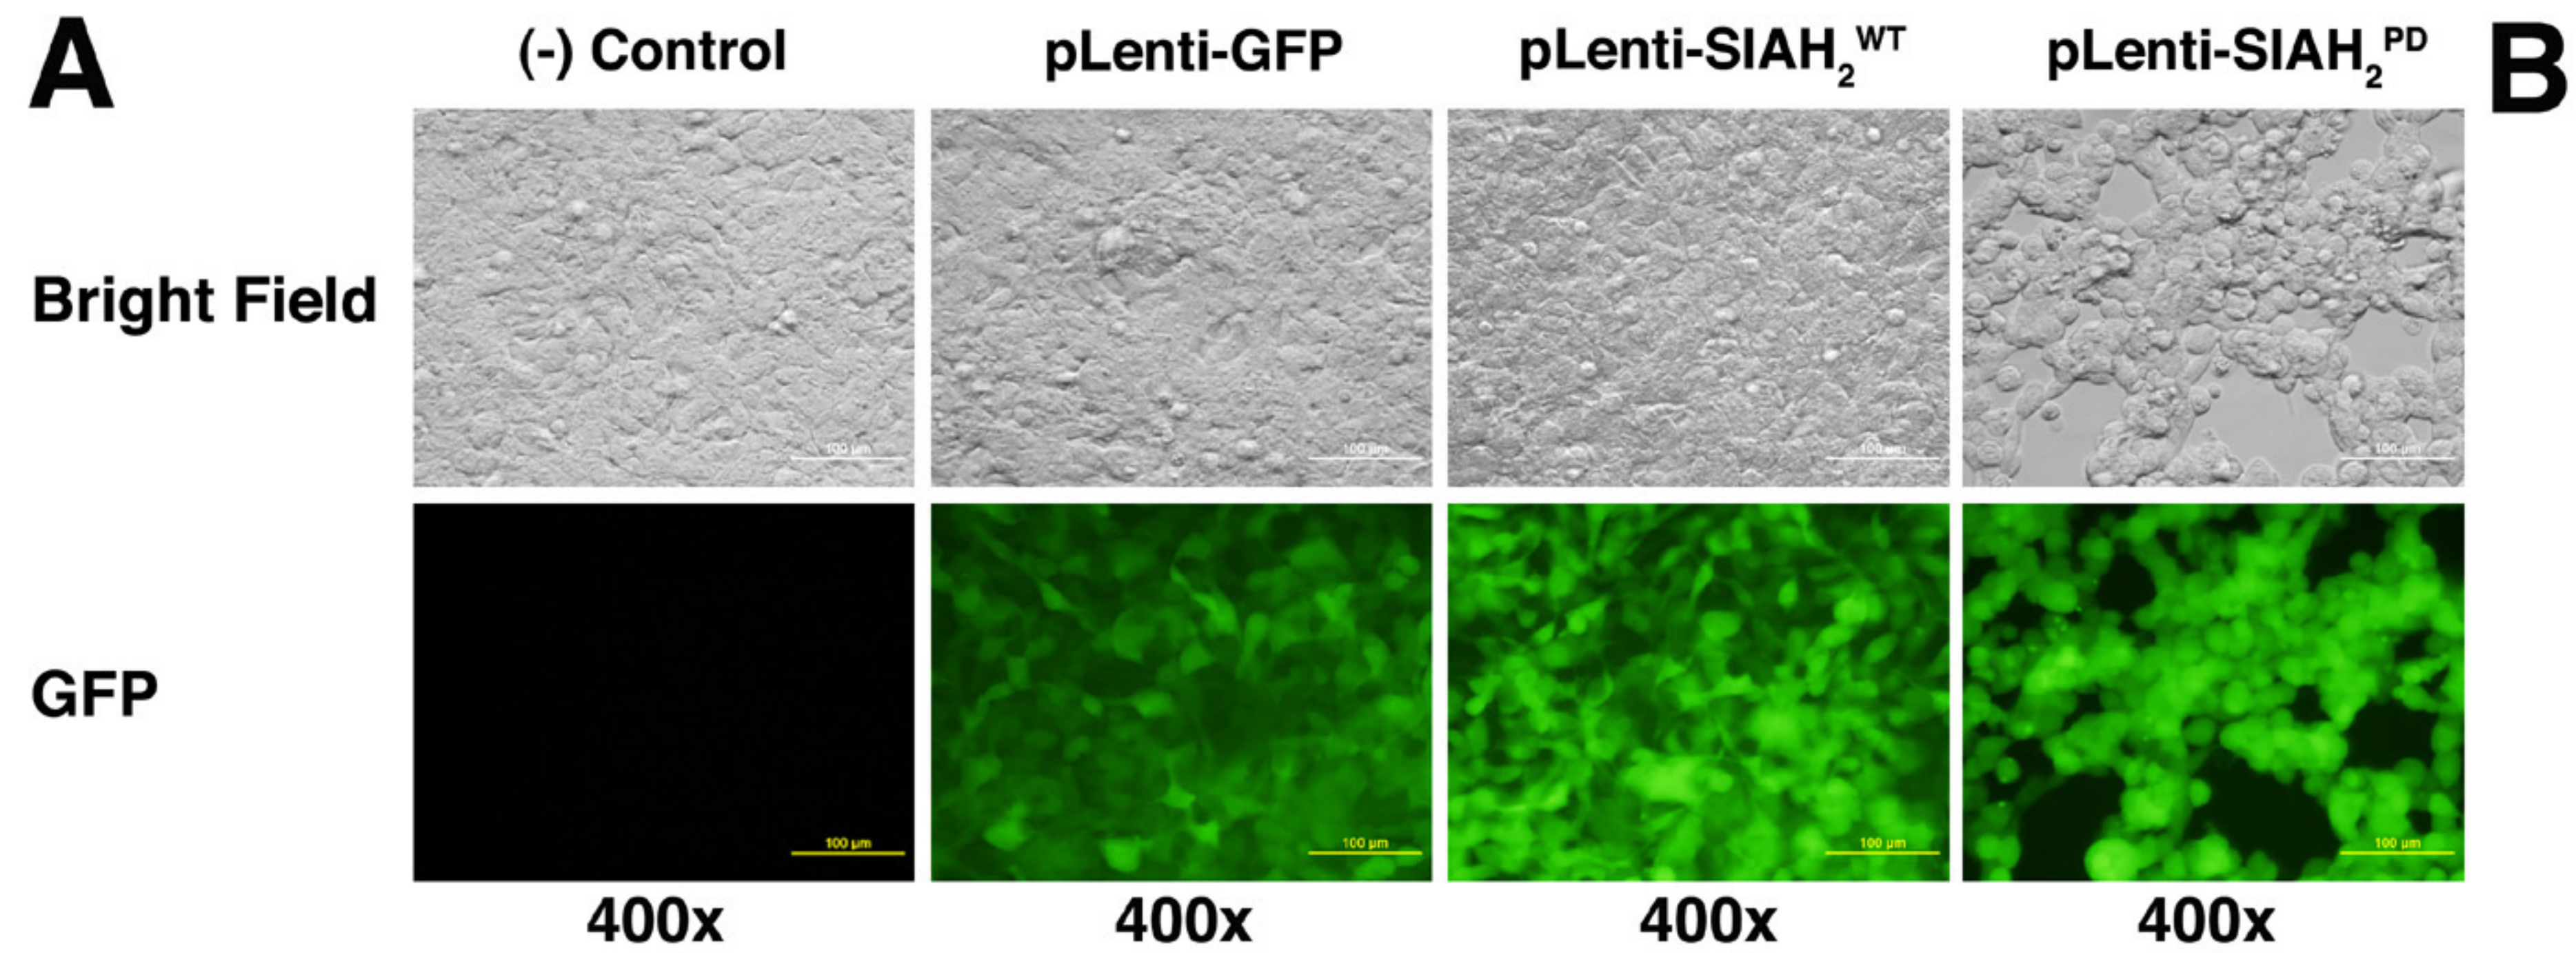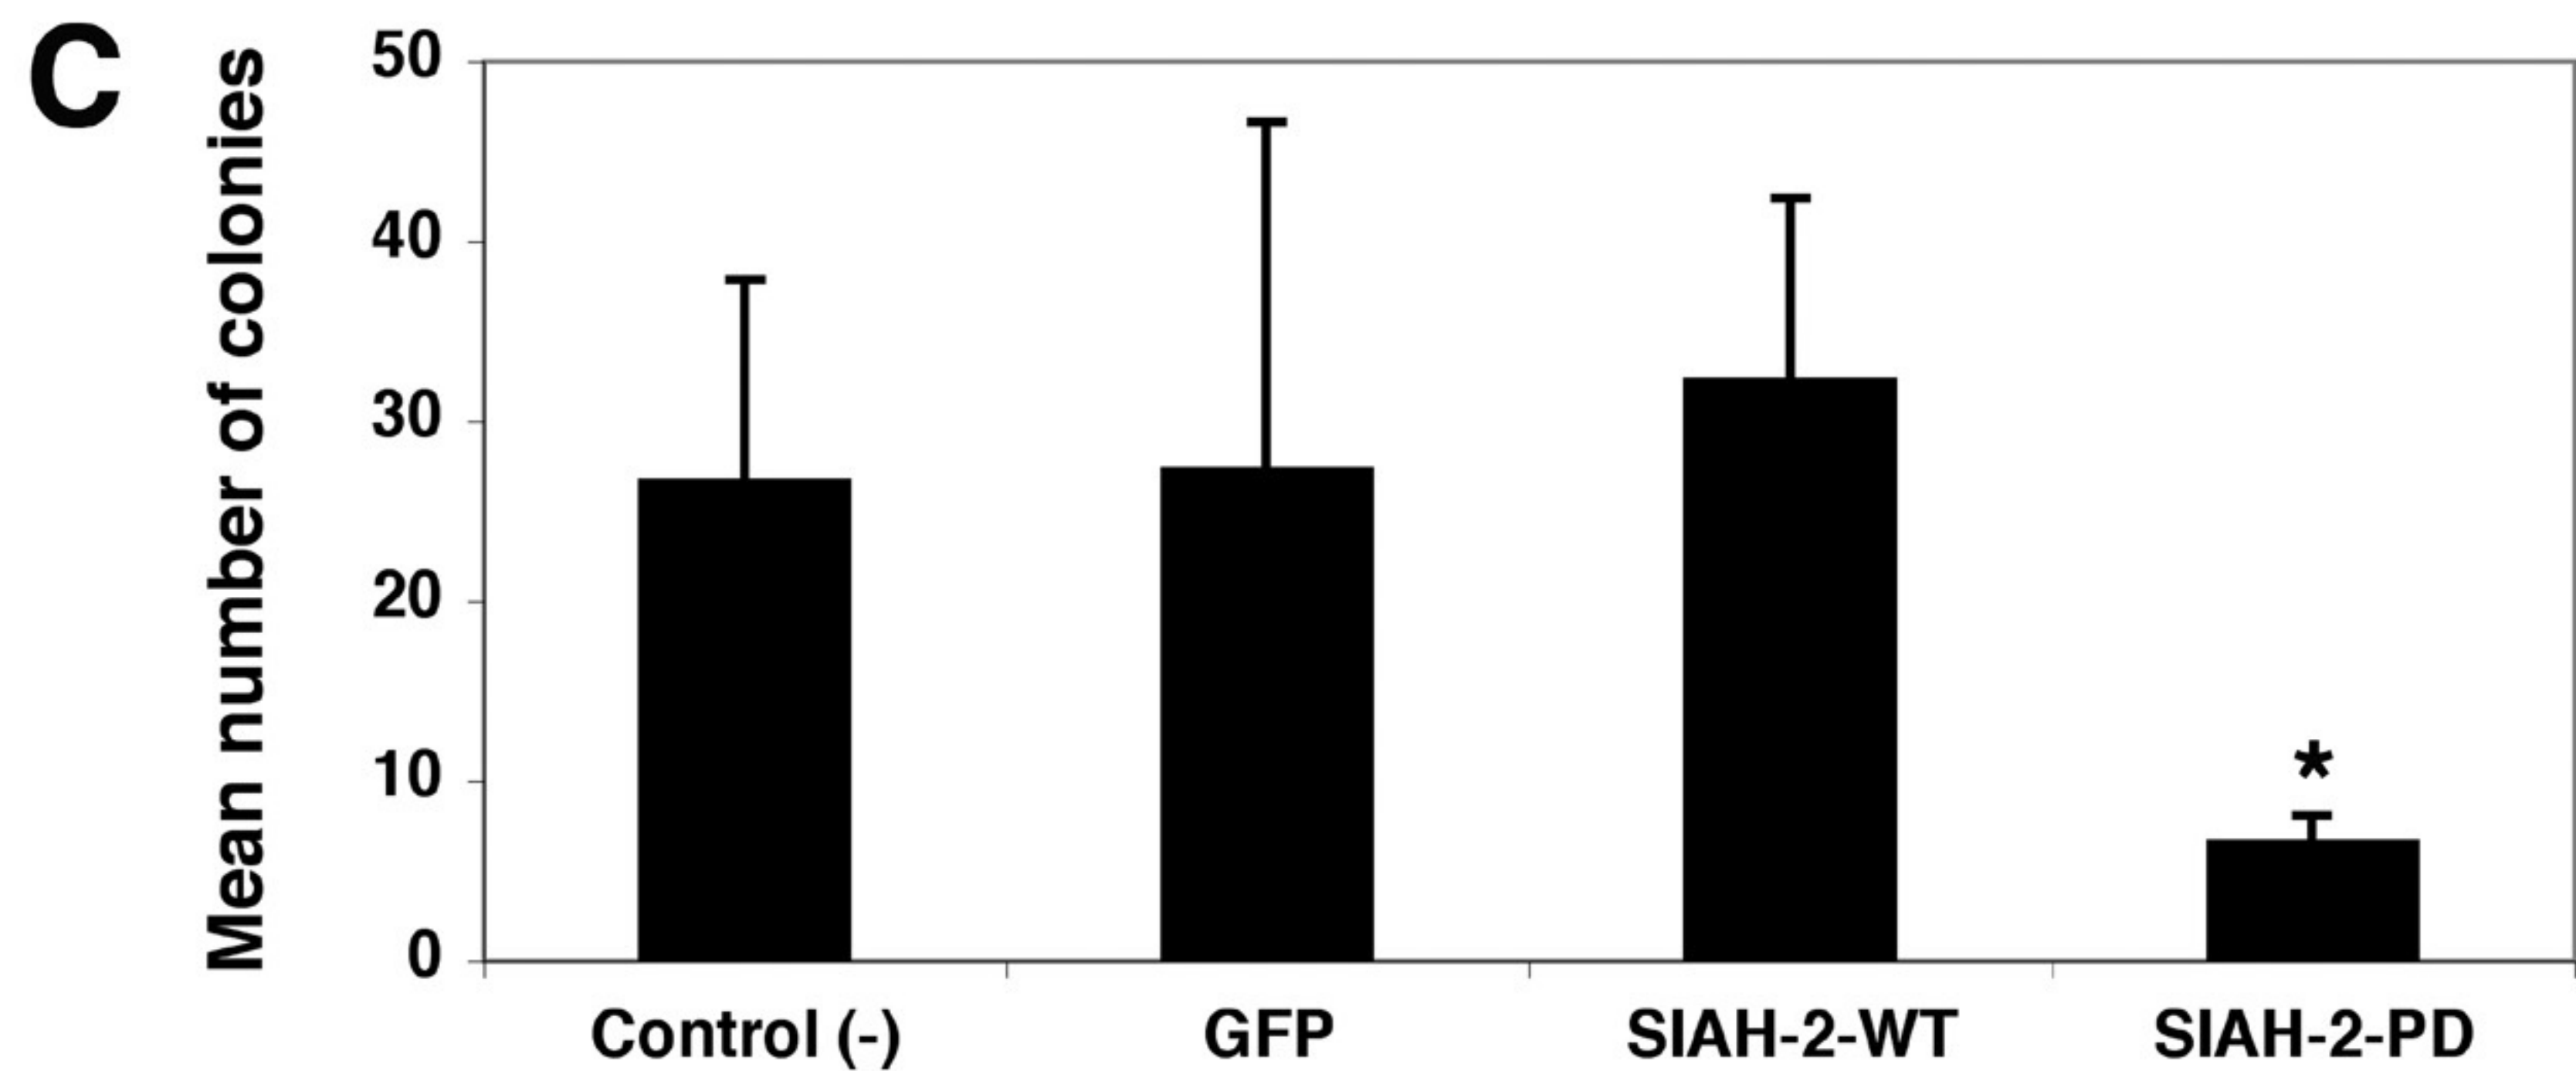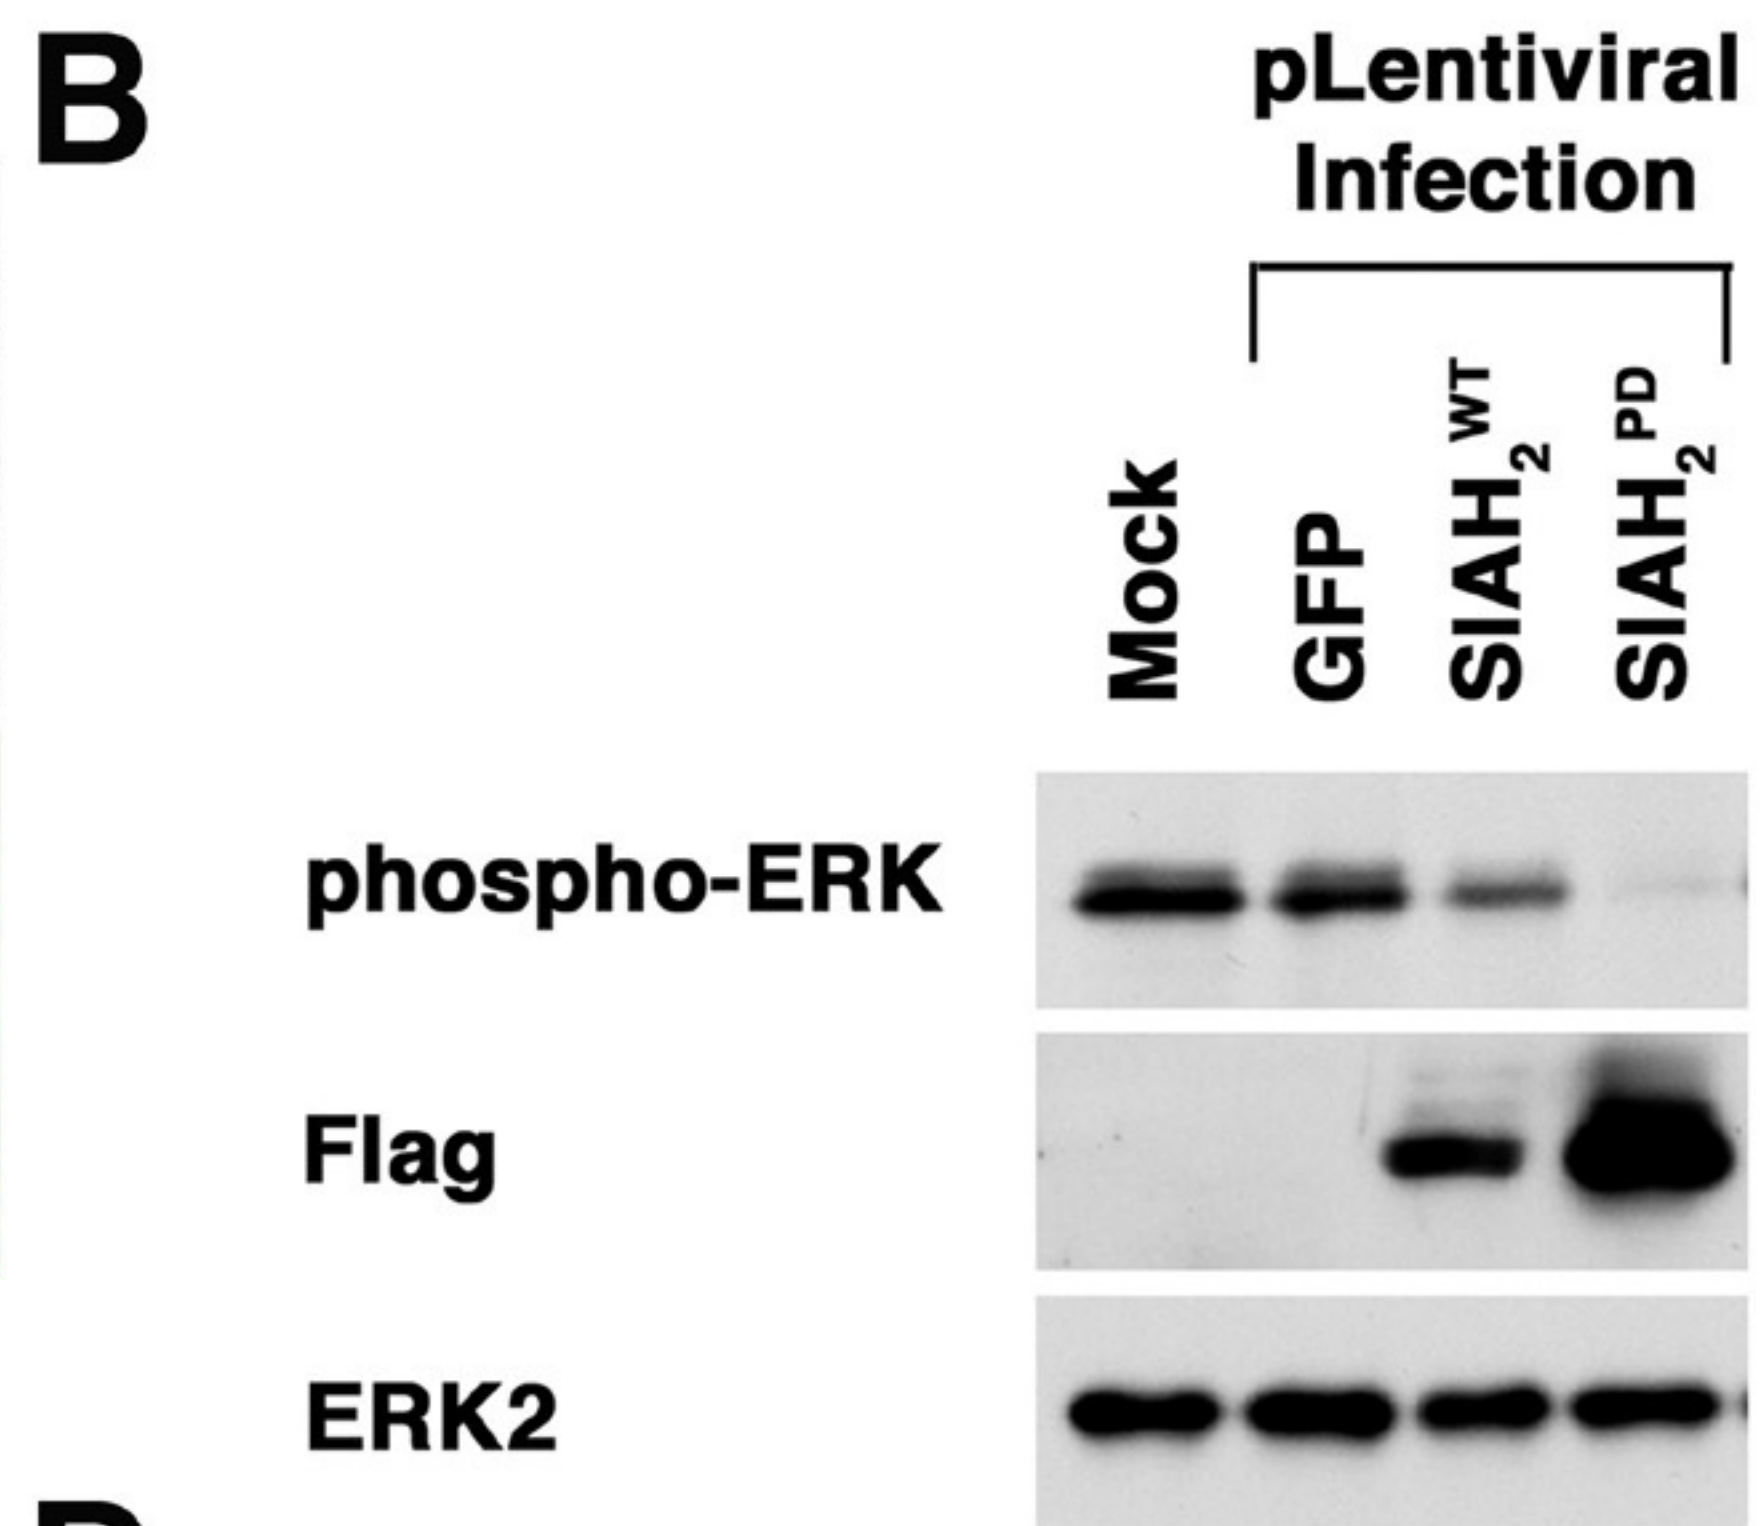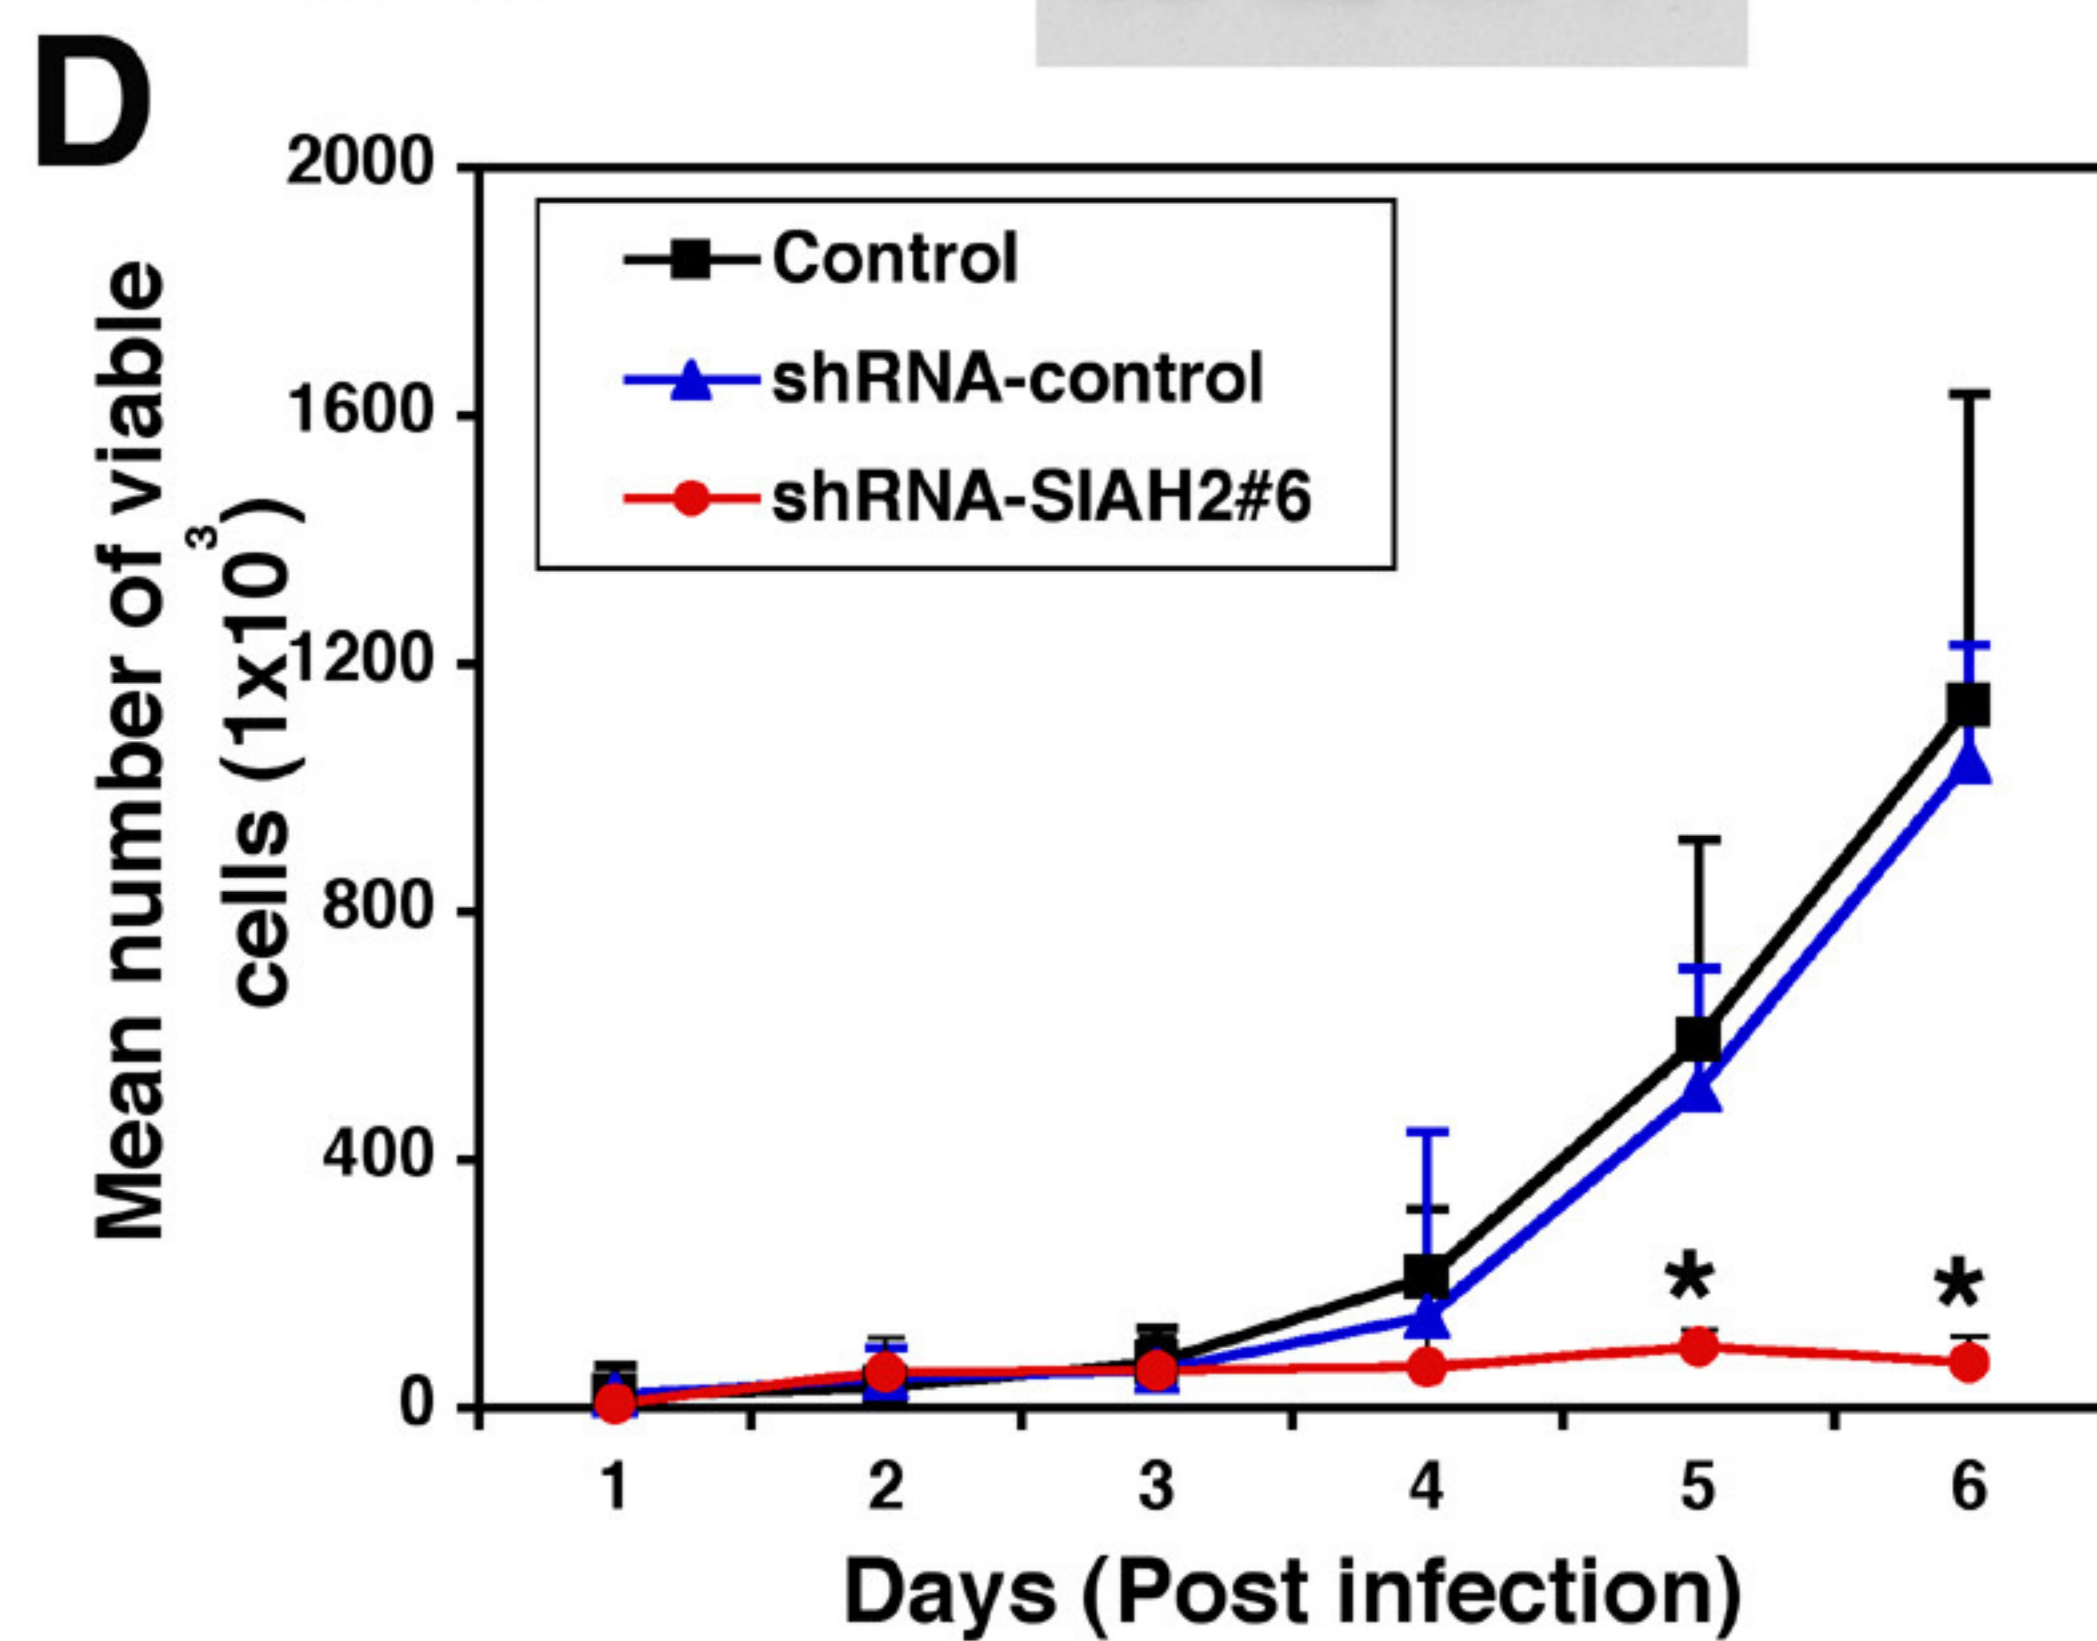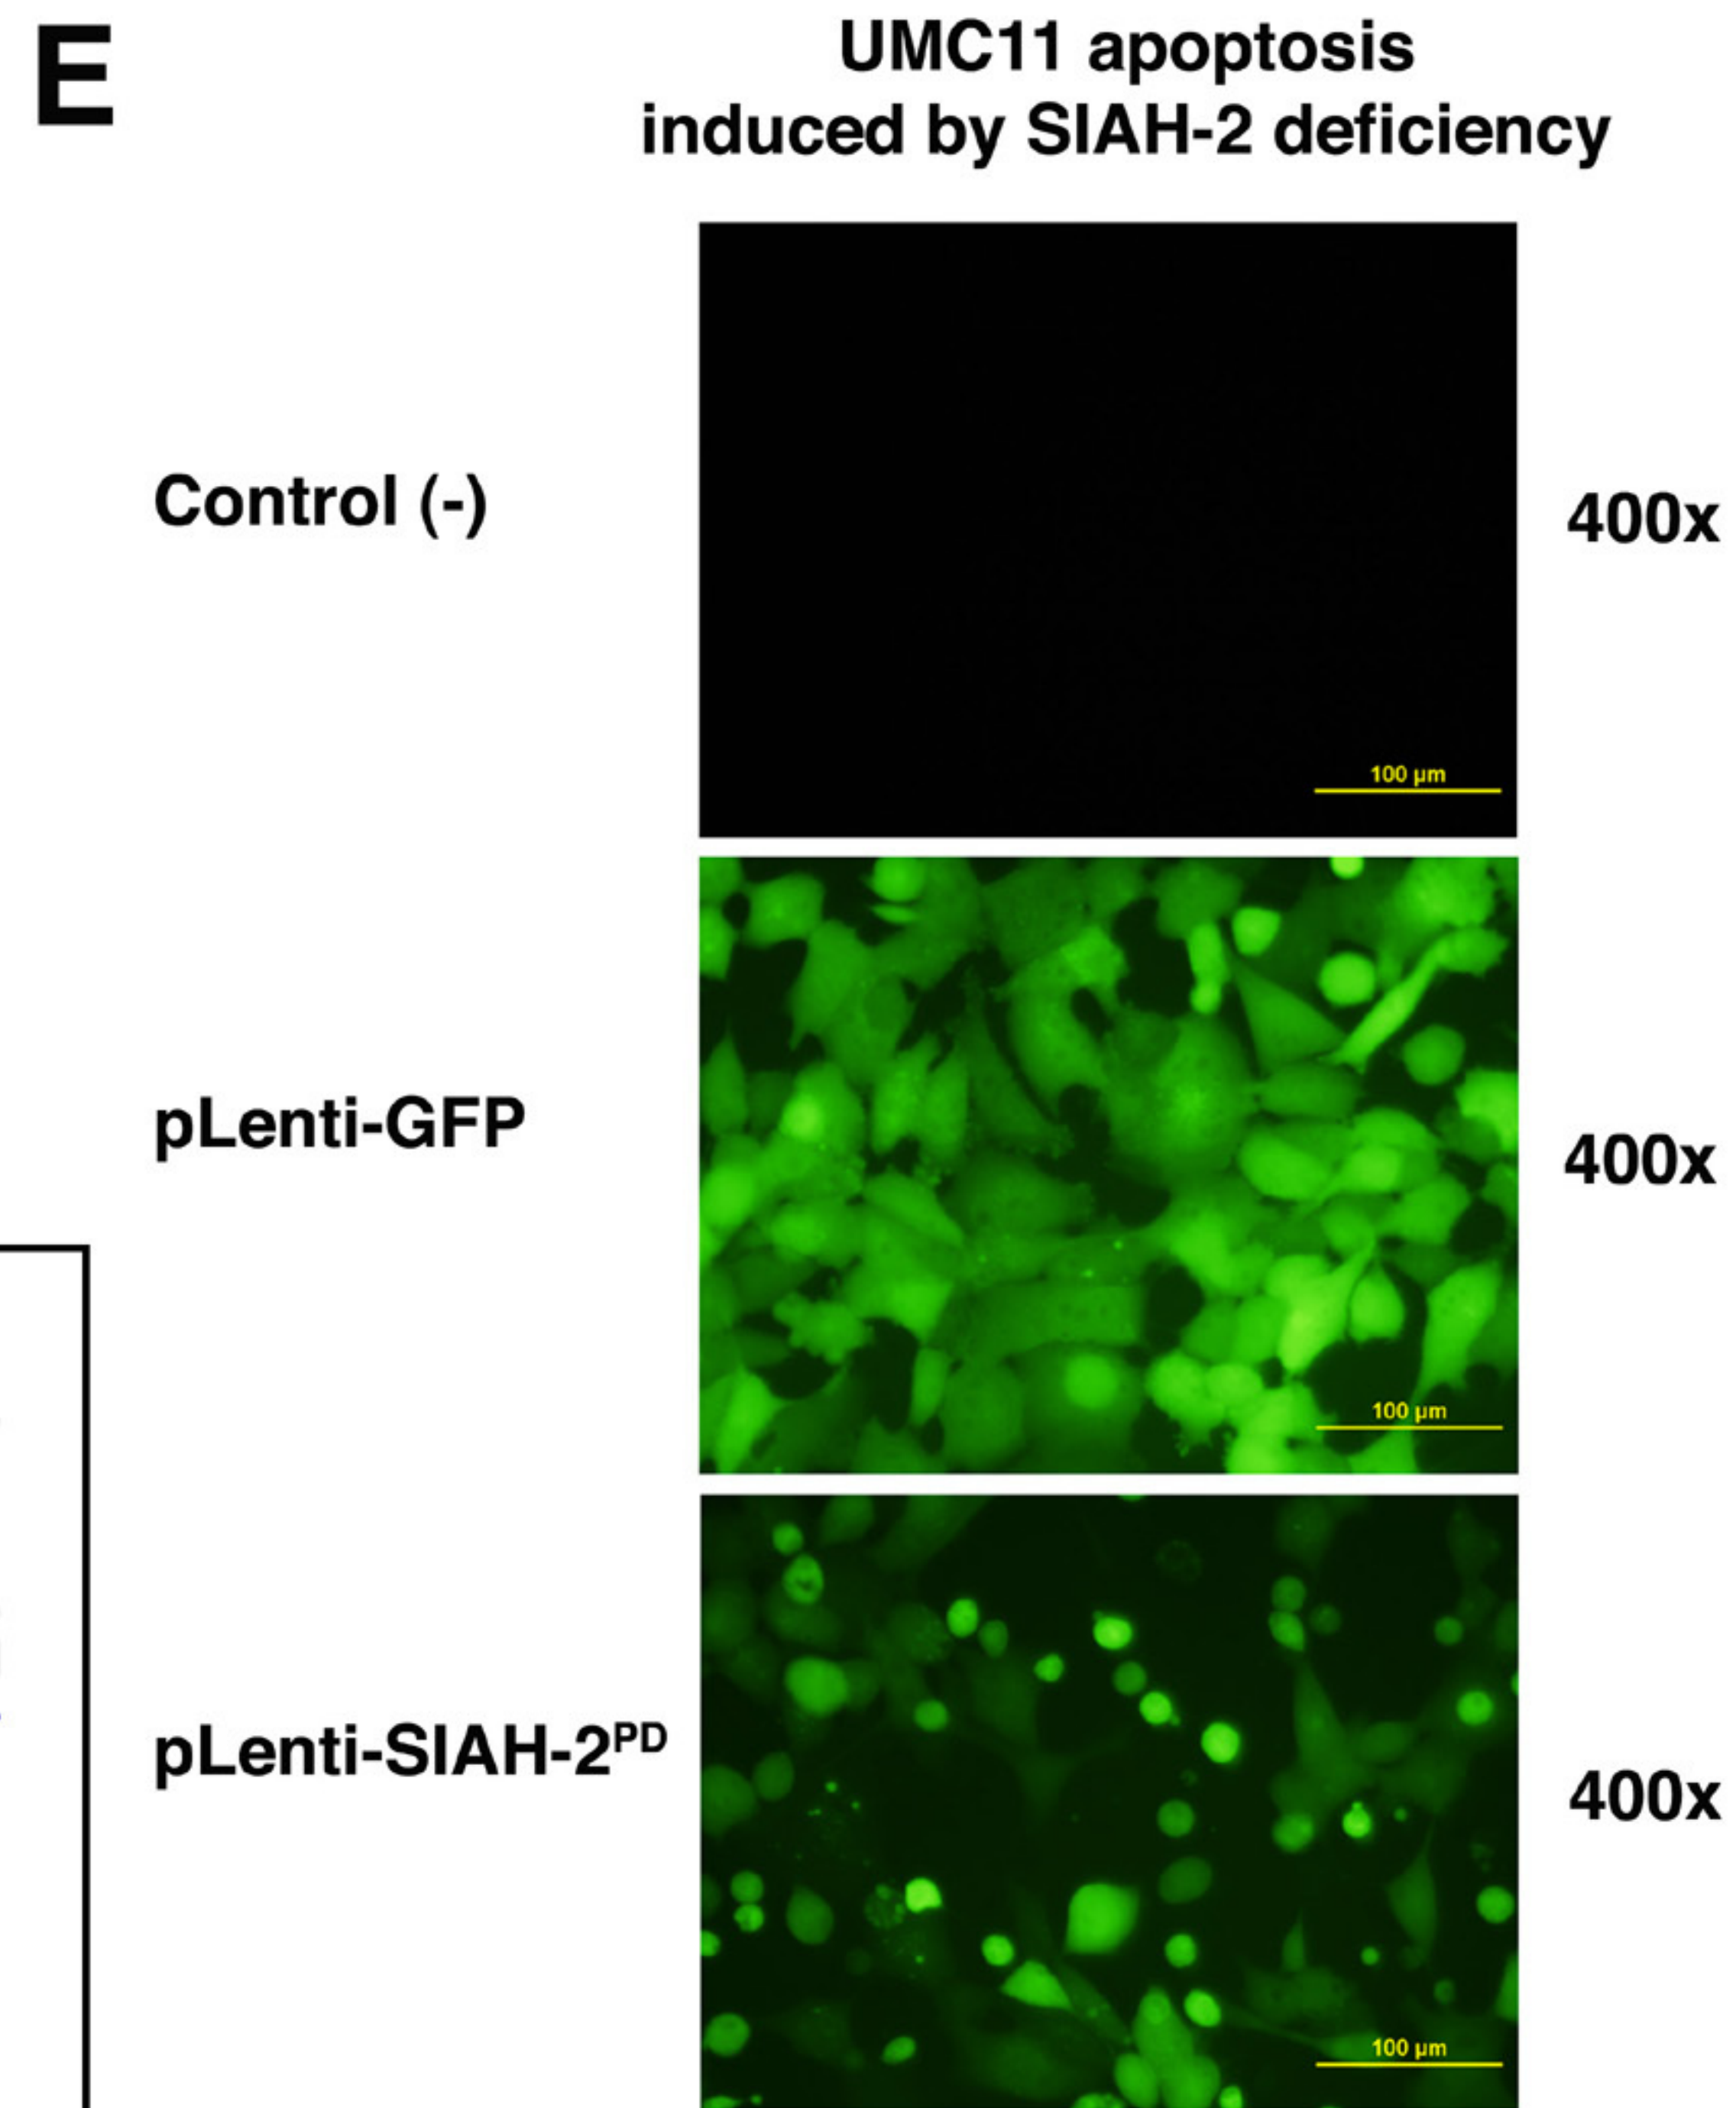

Supplement: djn365_3.pdf [file djn365_3.pdf]

**Control**

**pLenti-GFP**

**pLenti-SIAH<sub>2</sub><sup>PD</sup>**

**H&E**

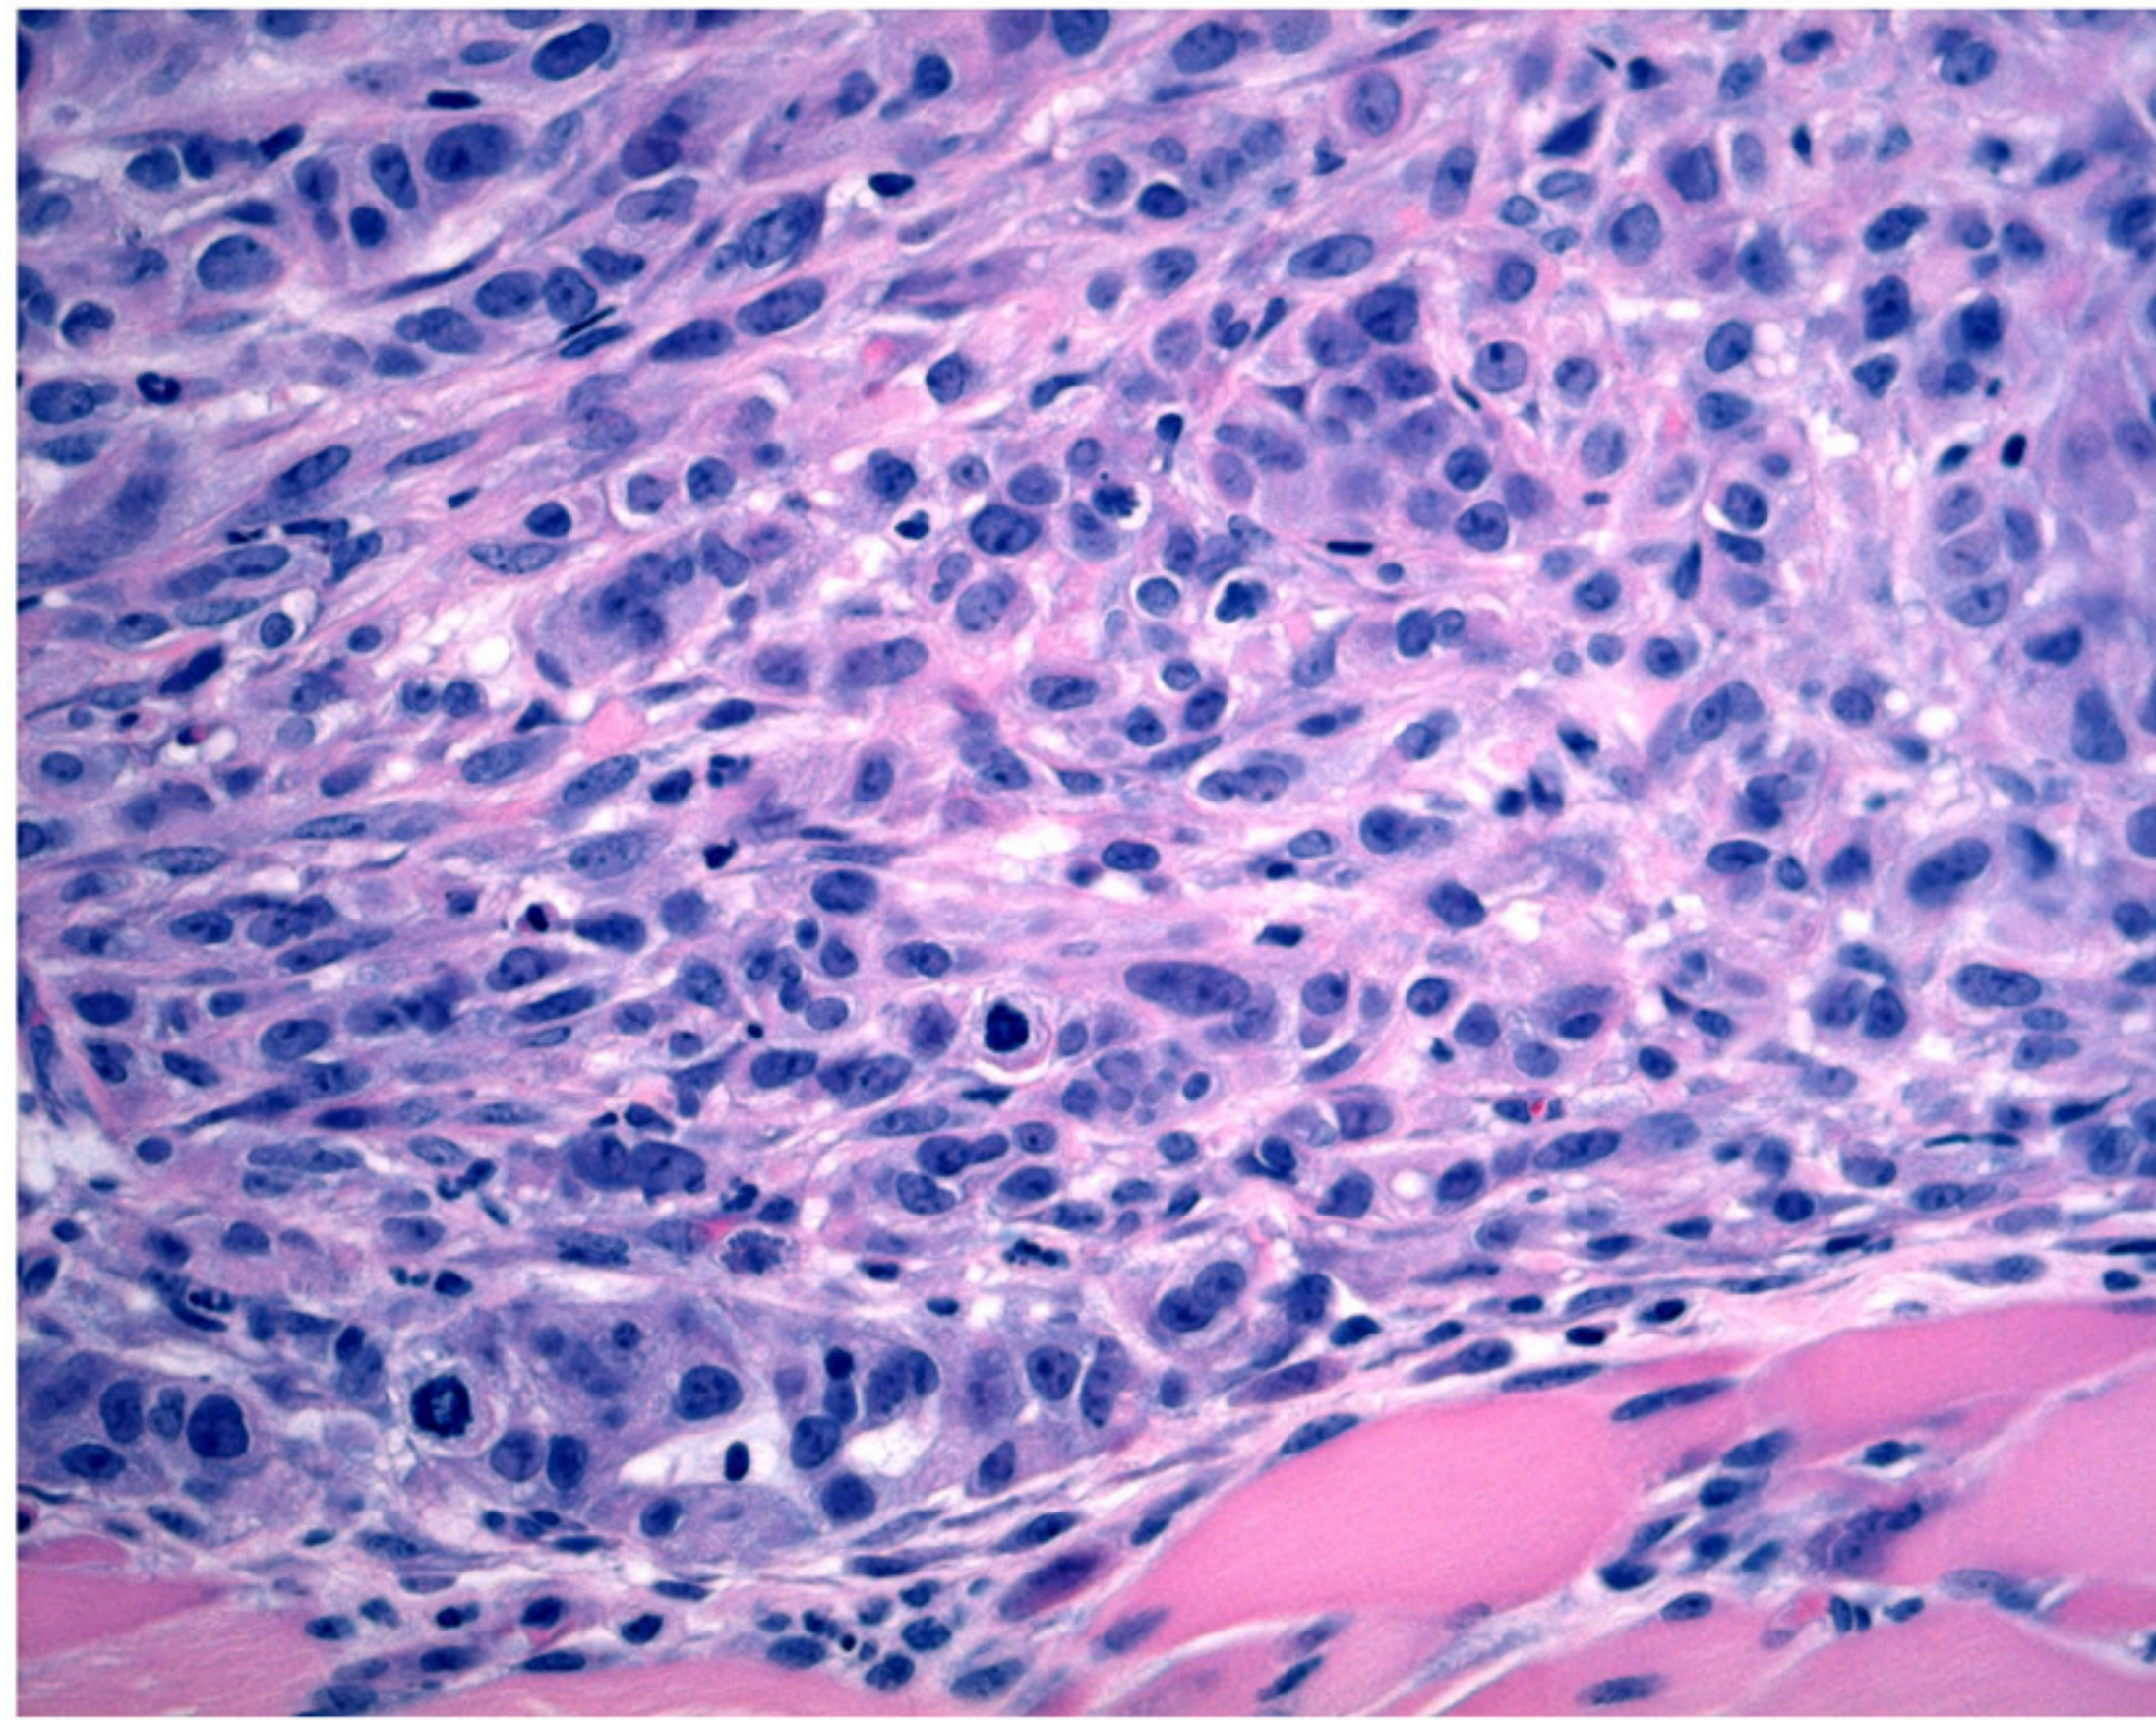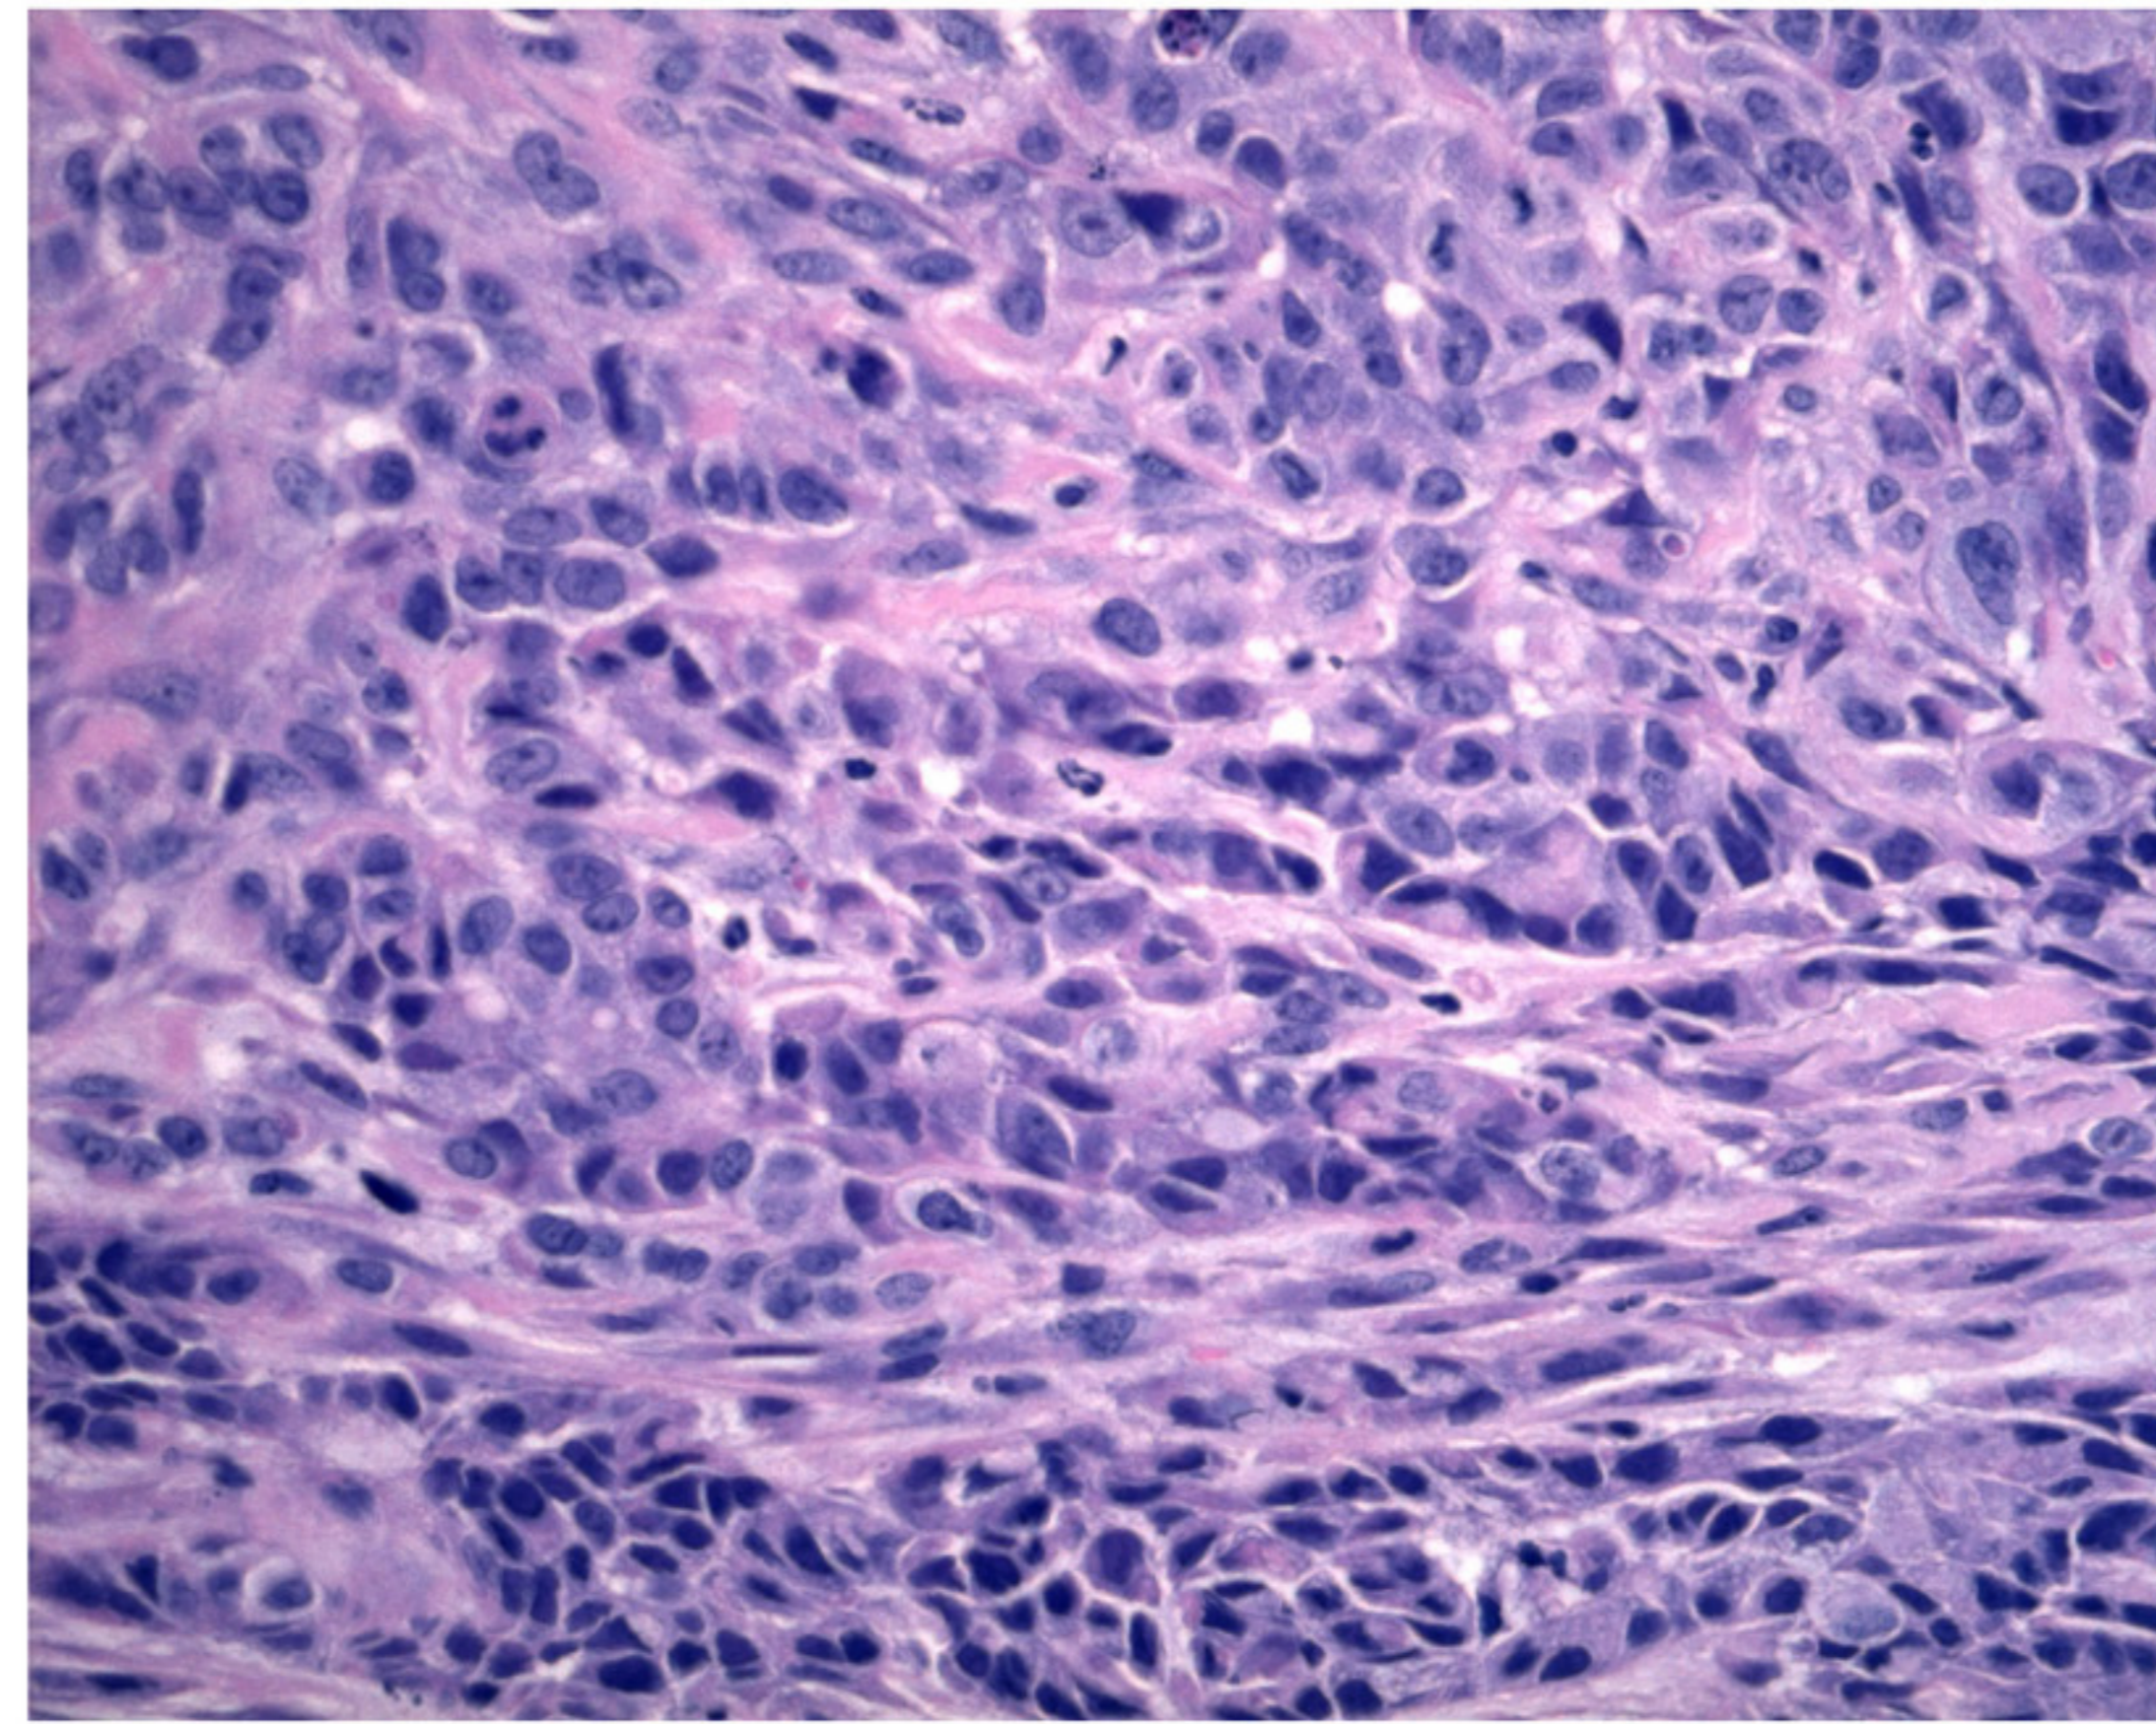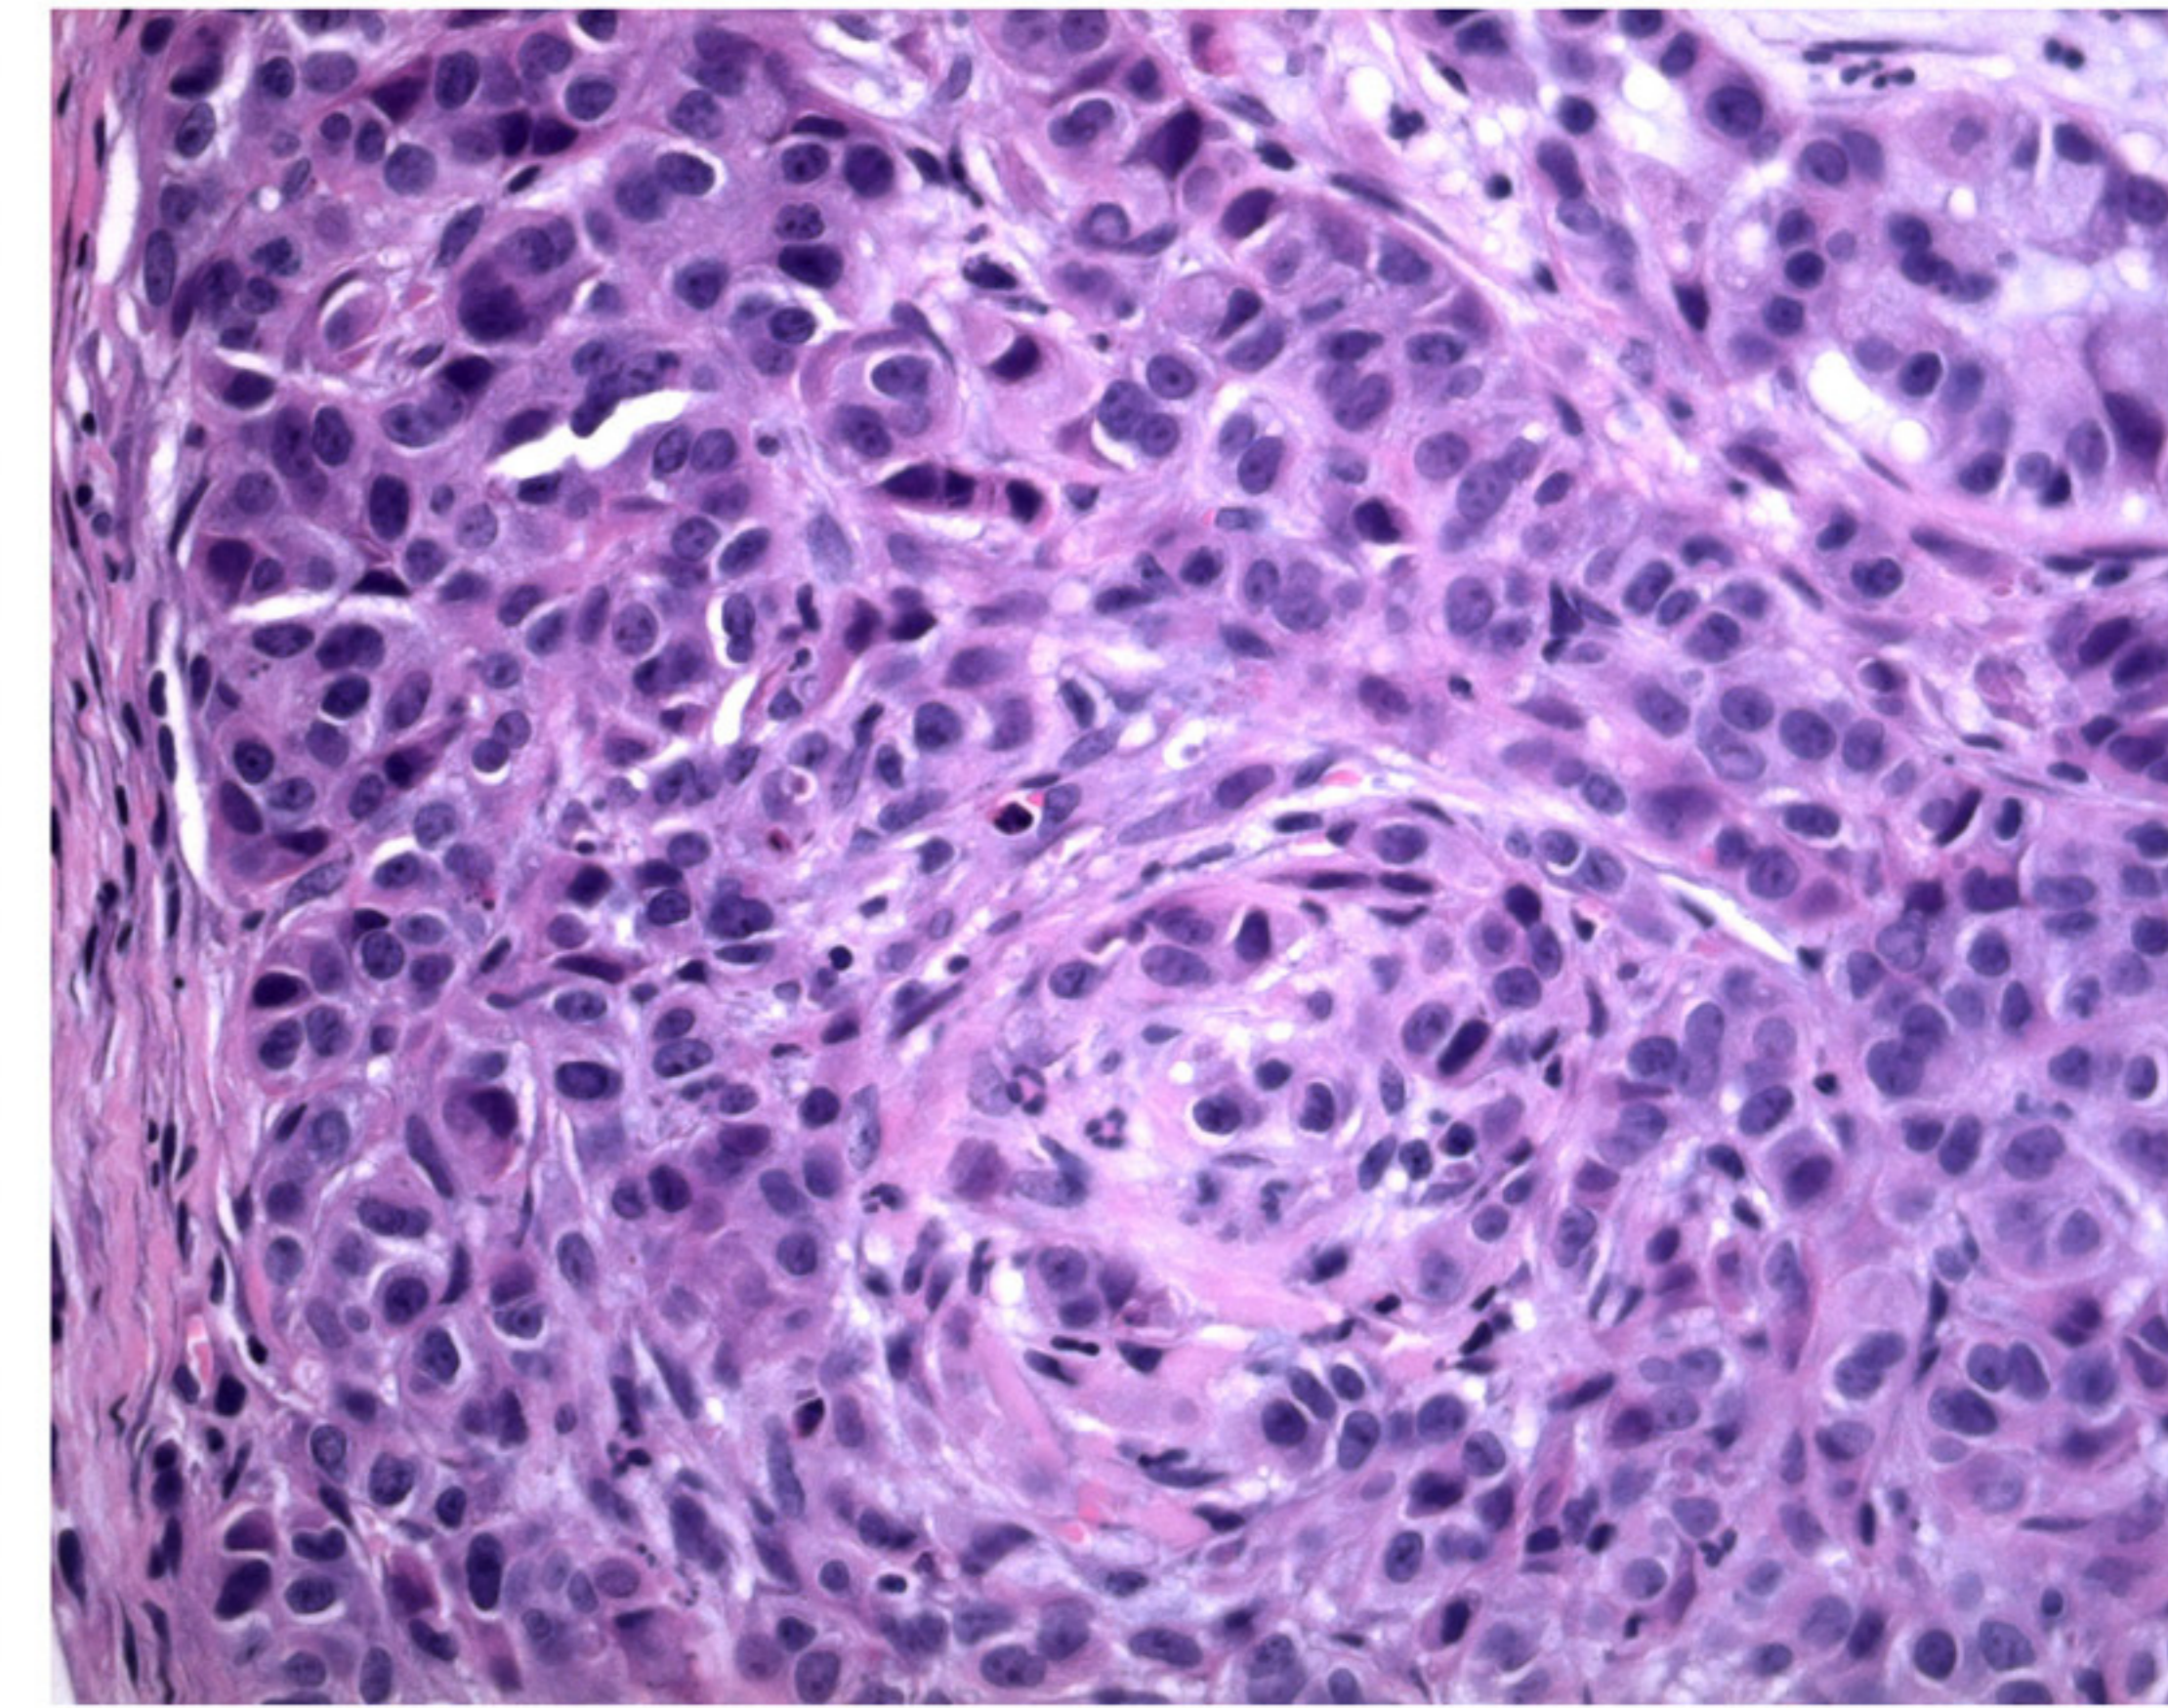

**SIAH**

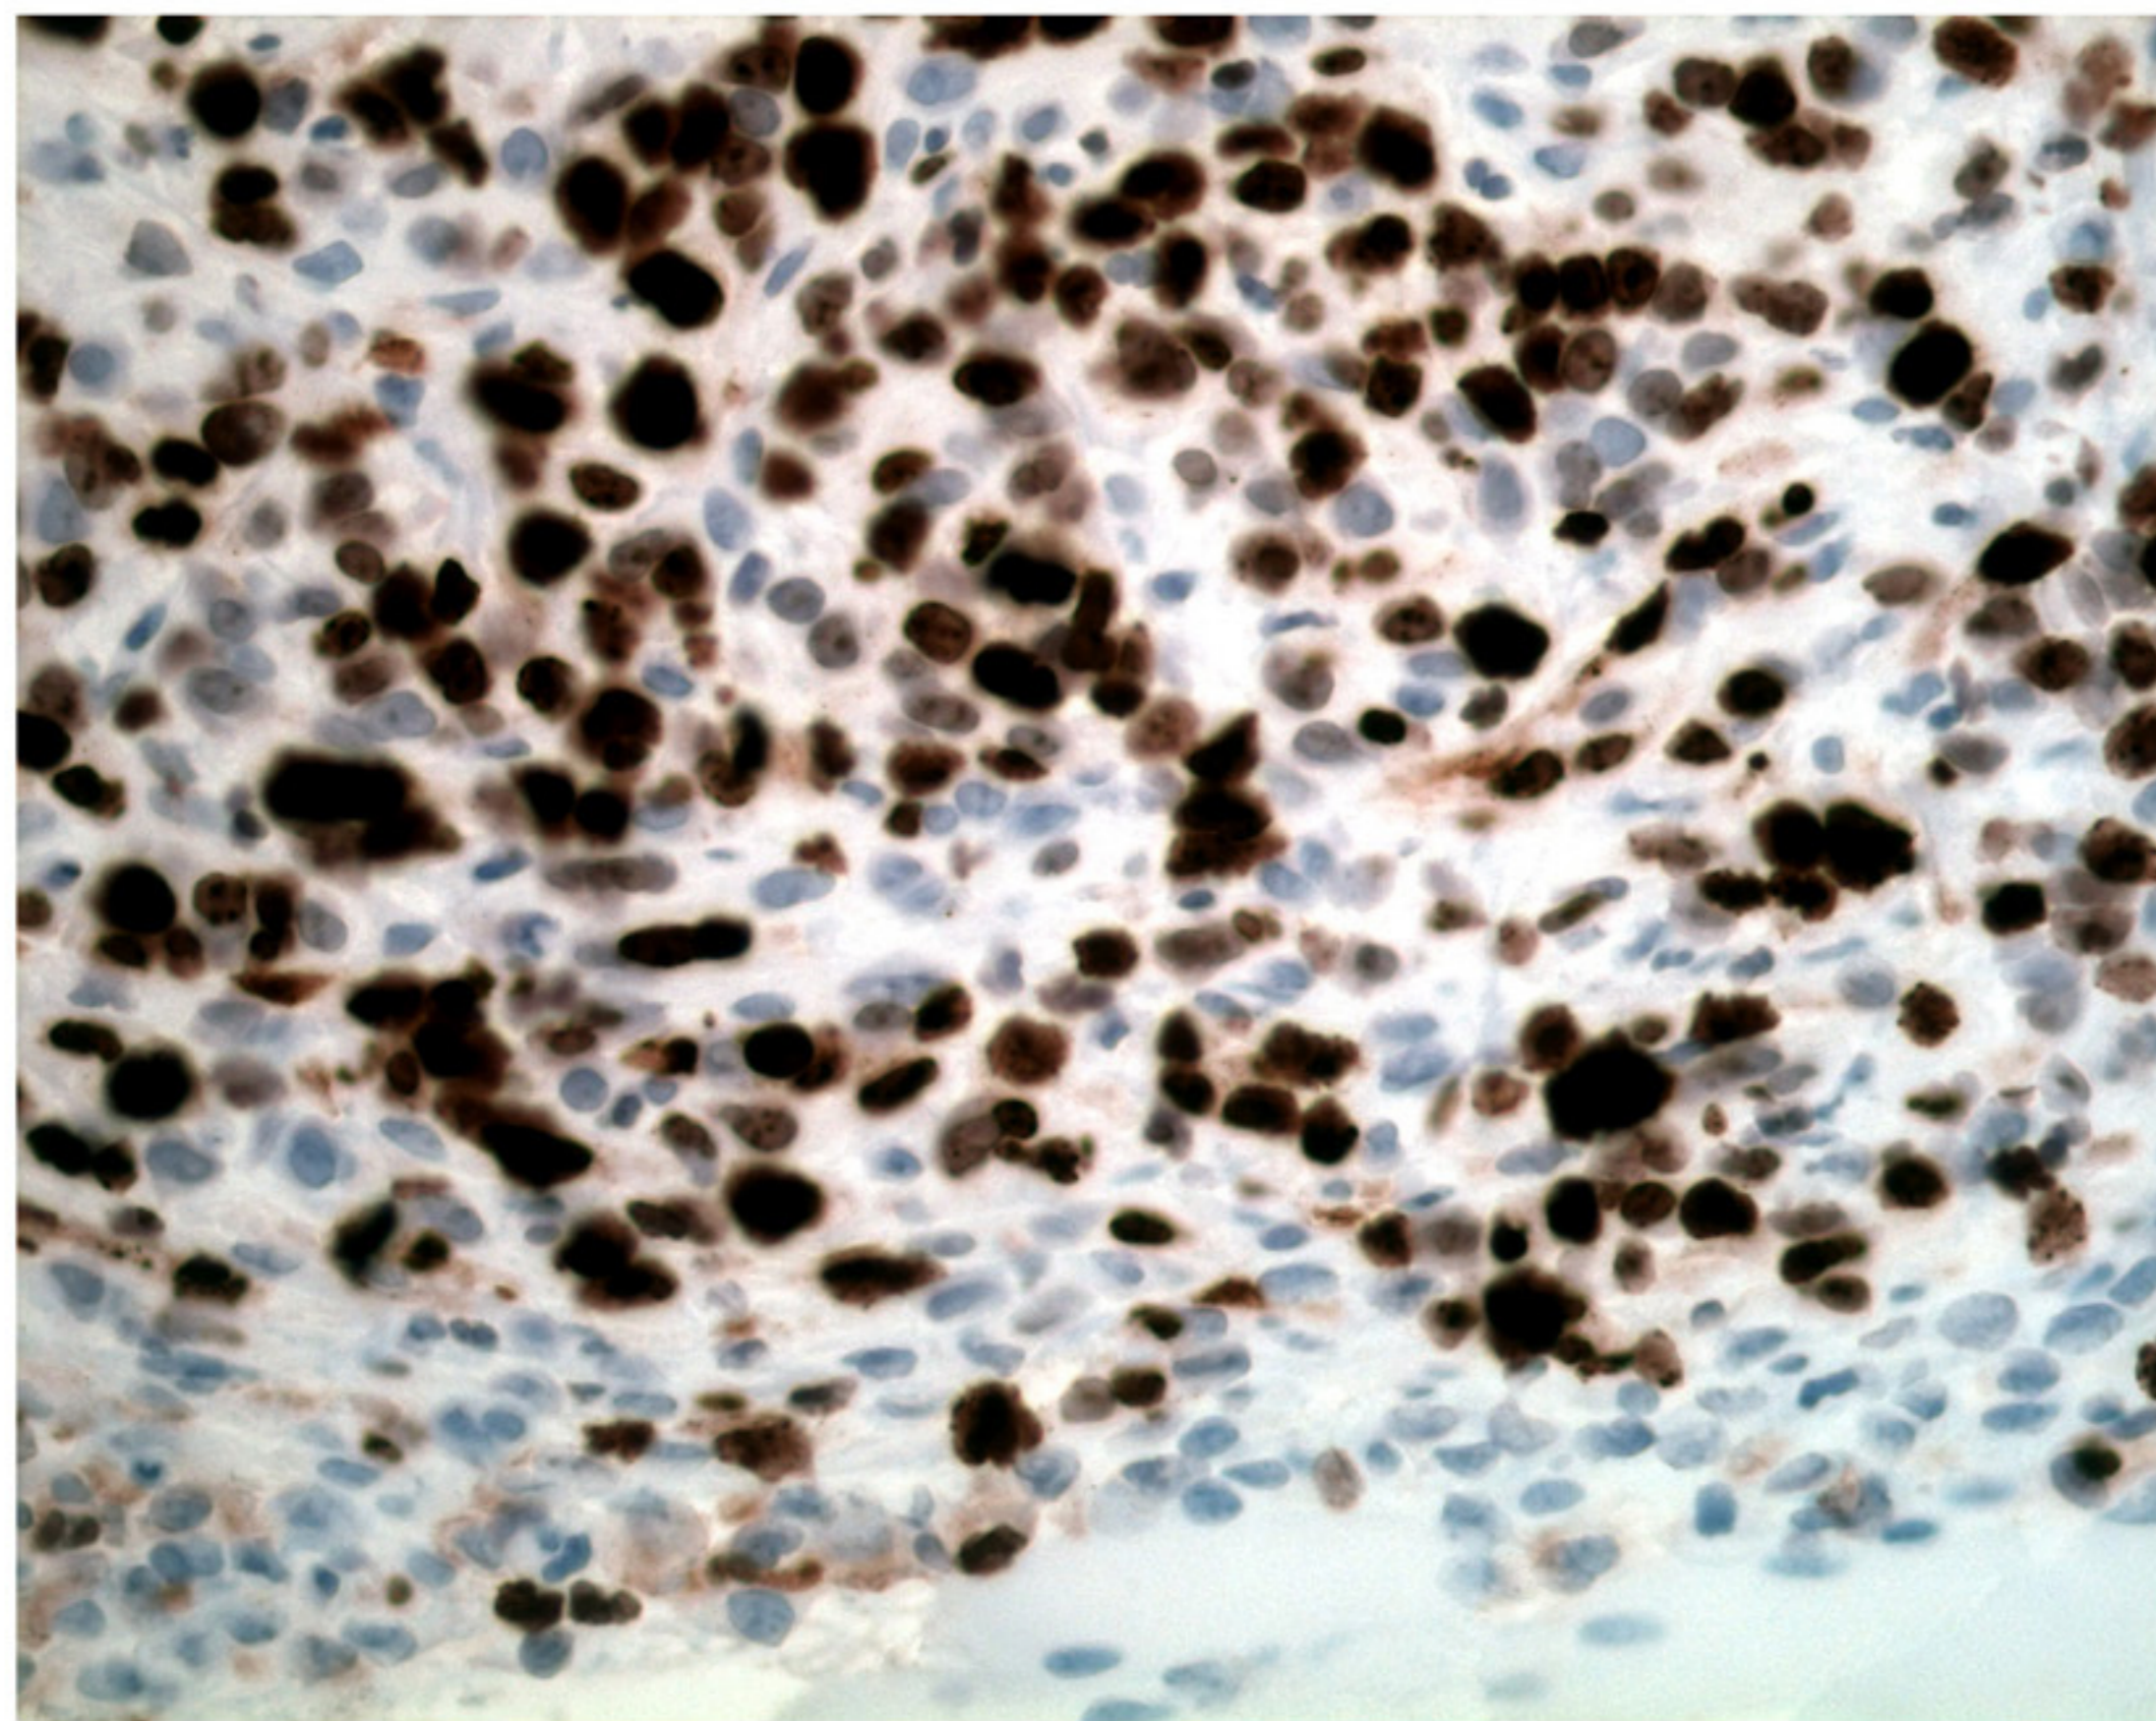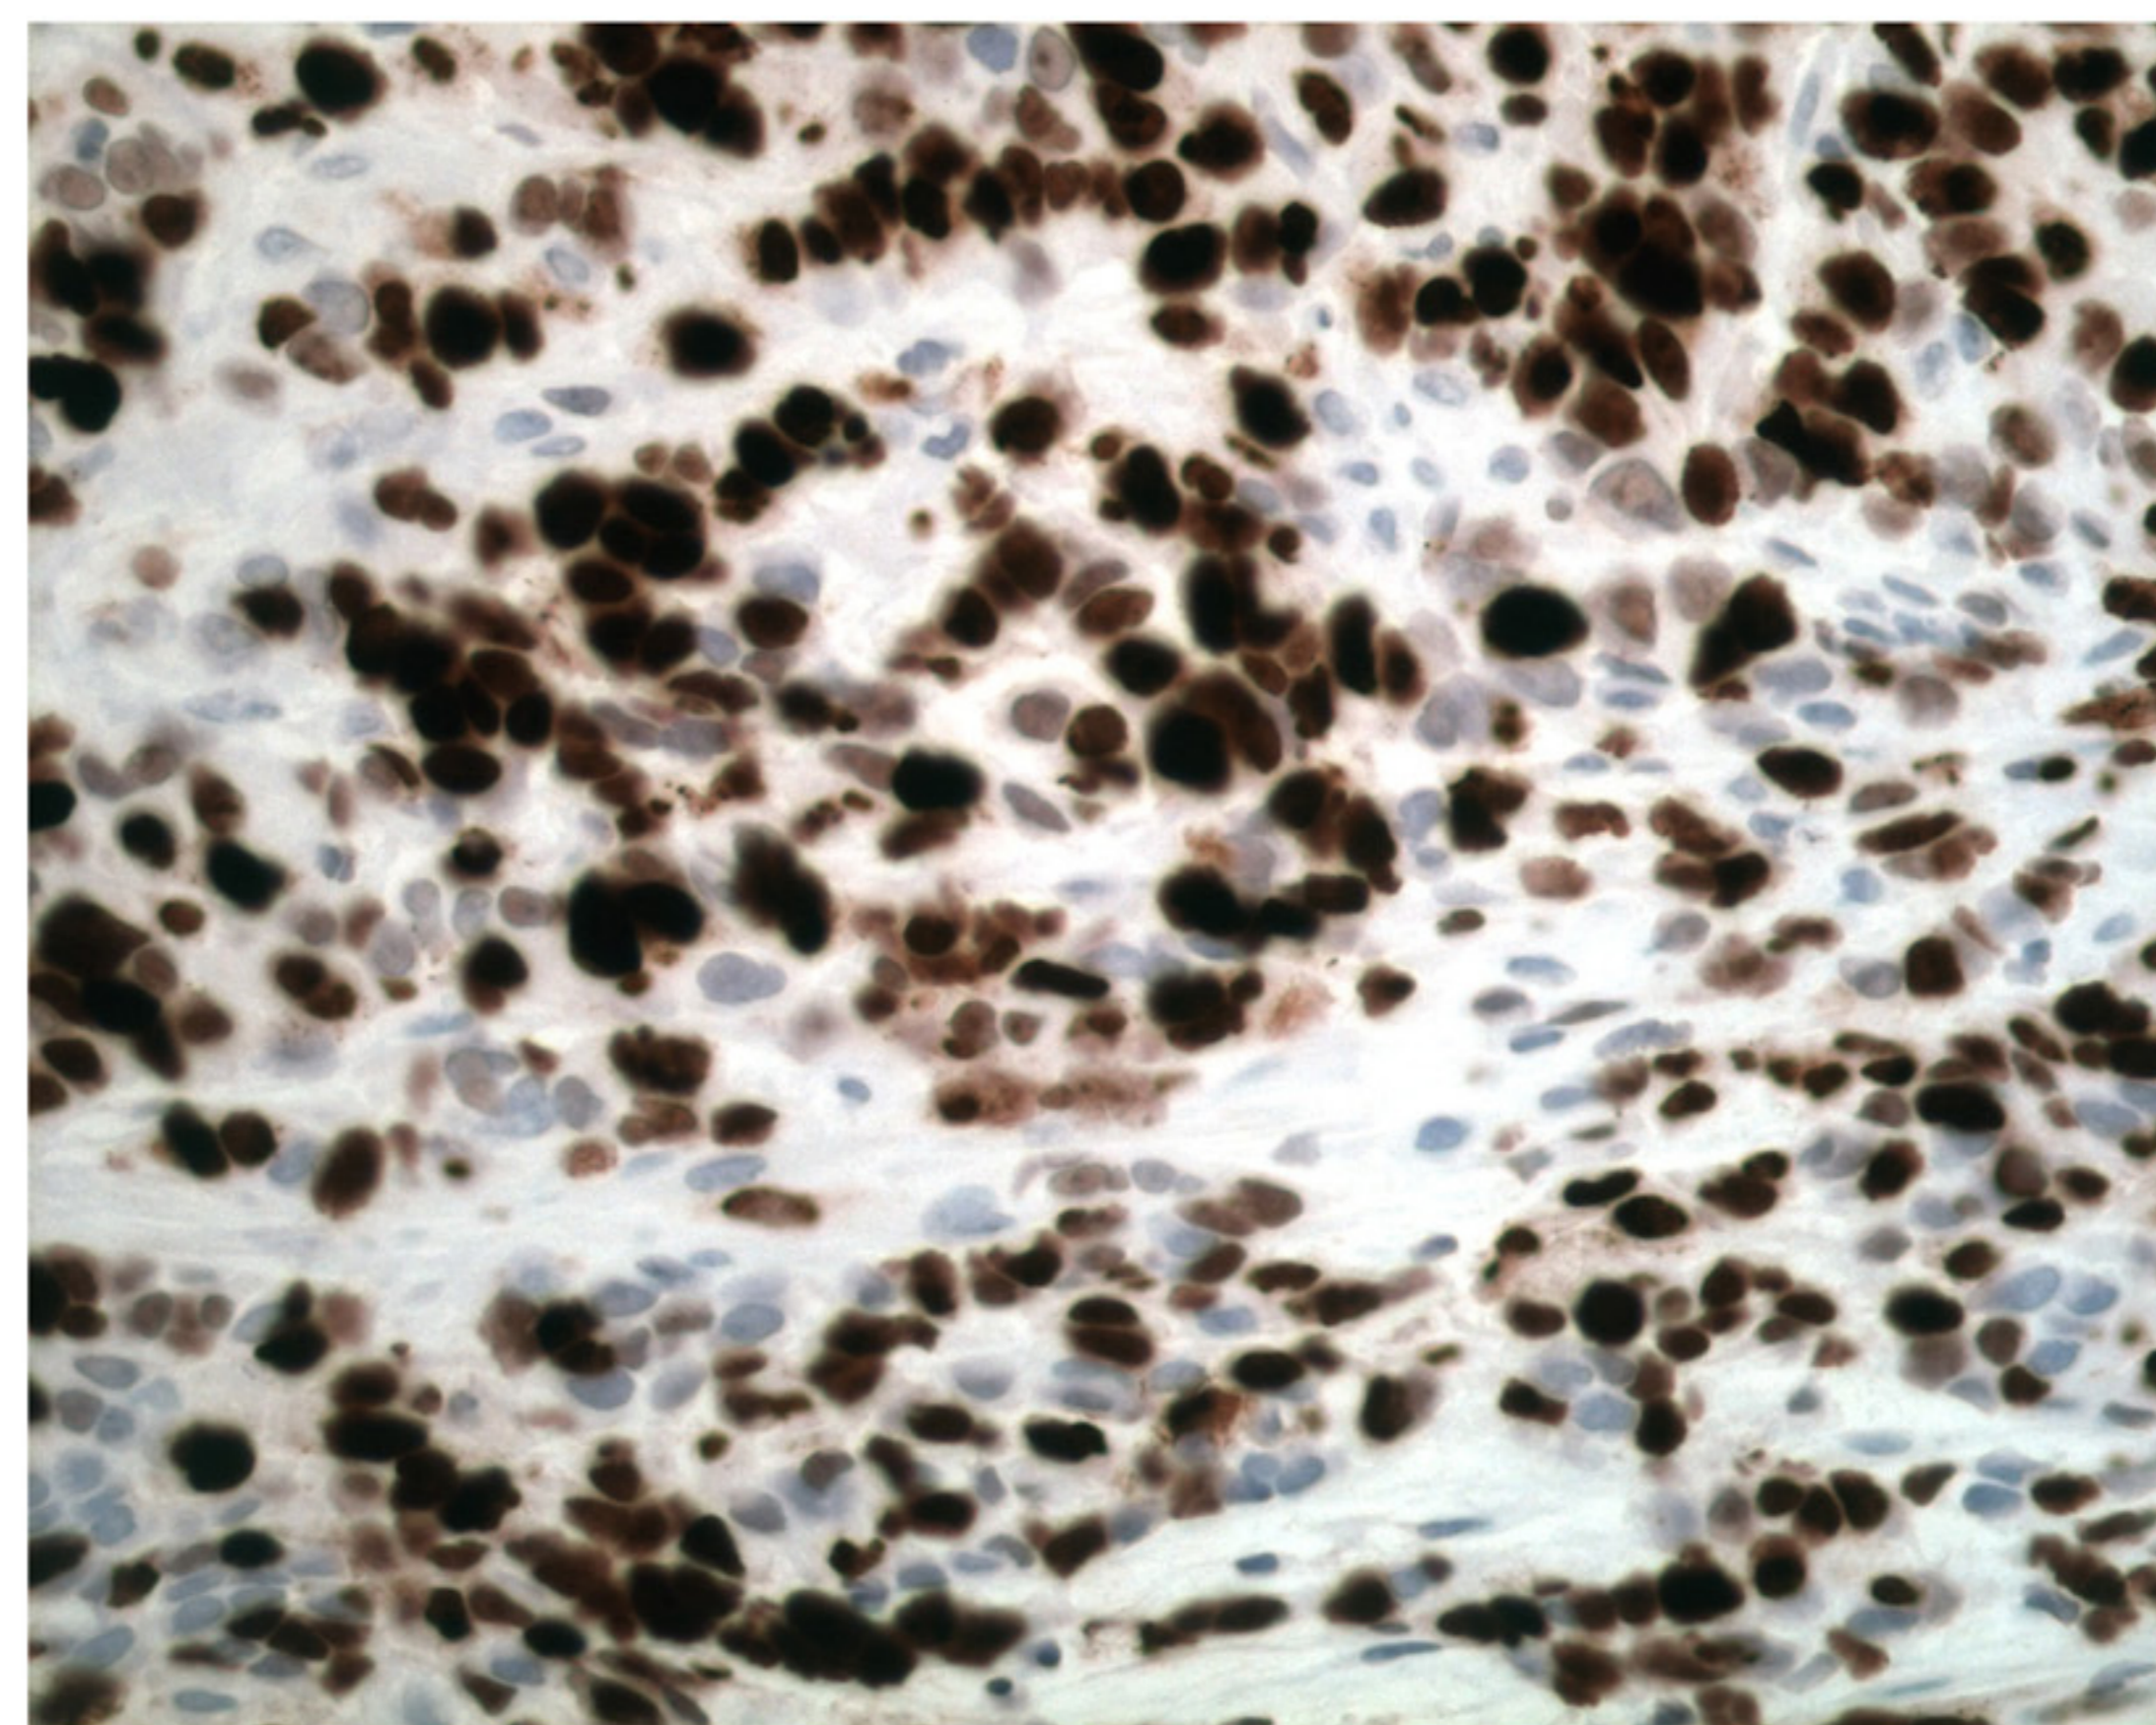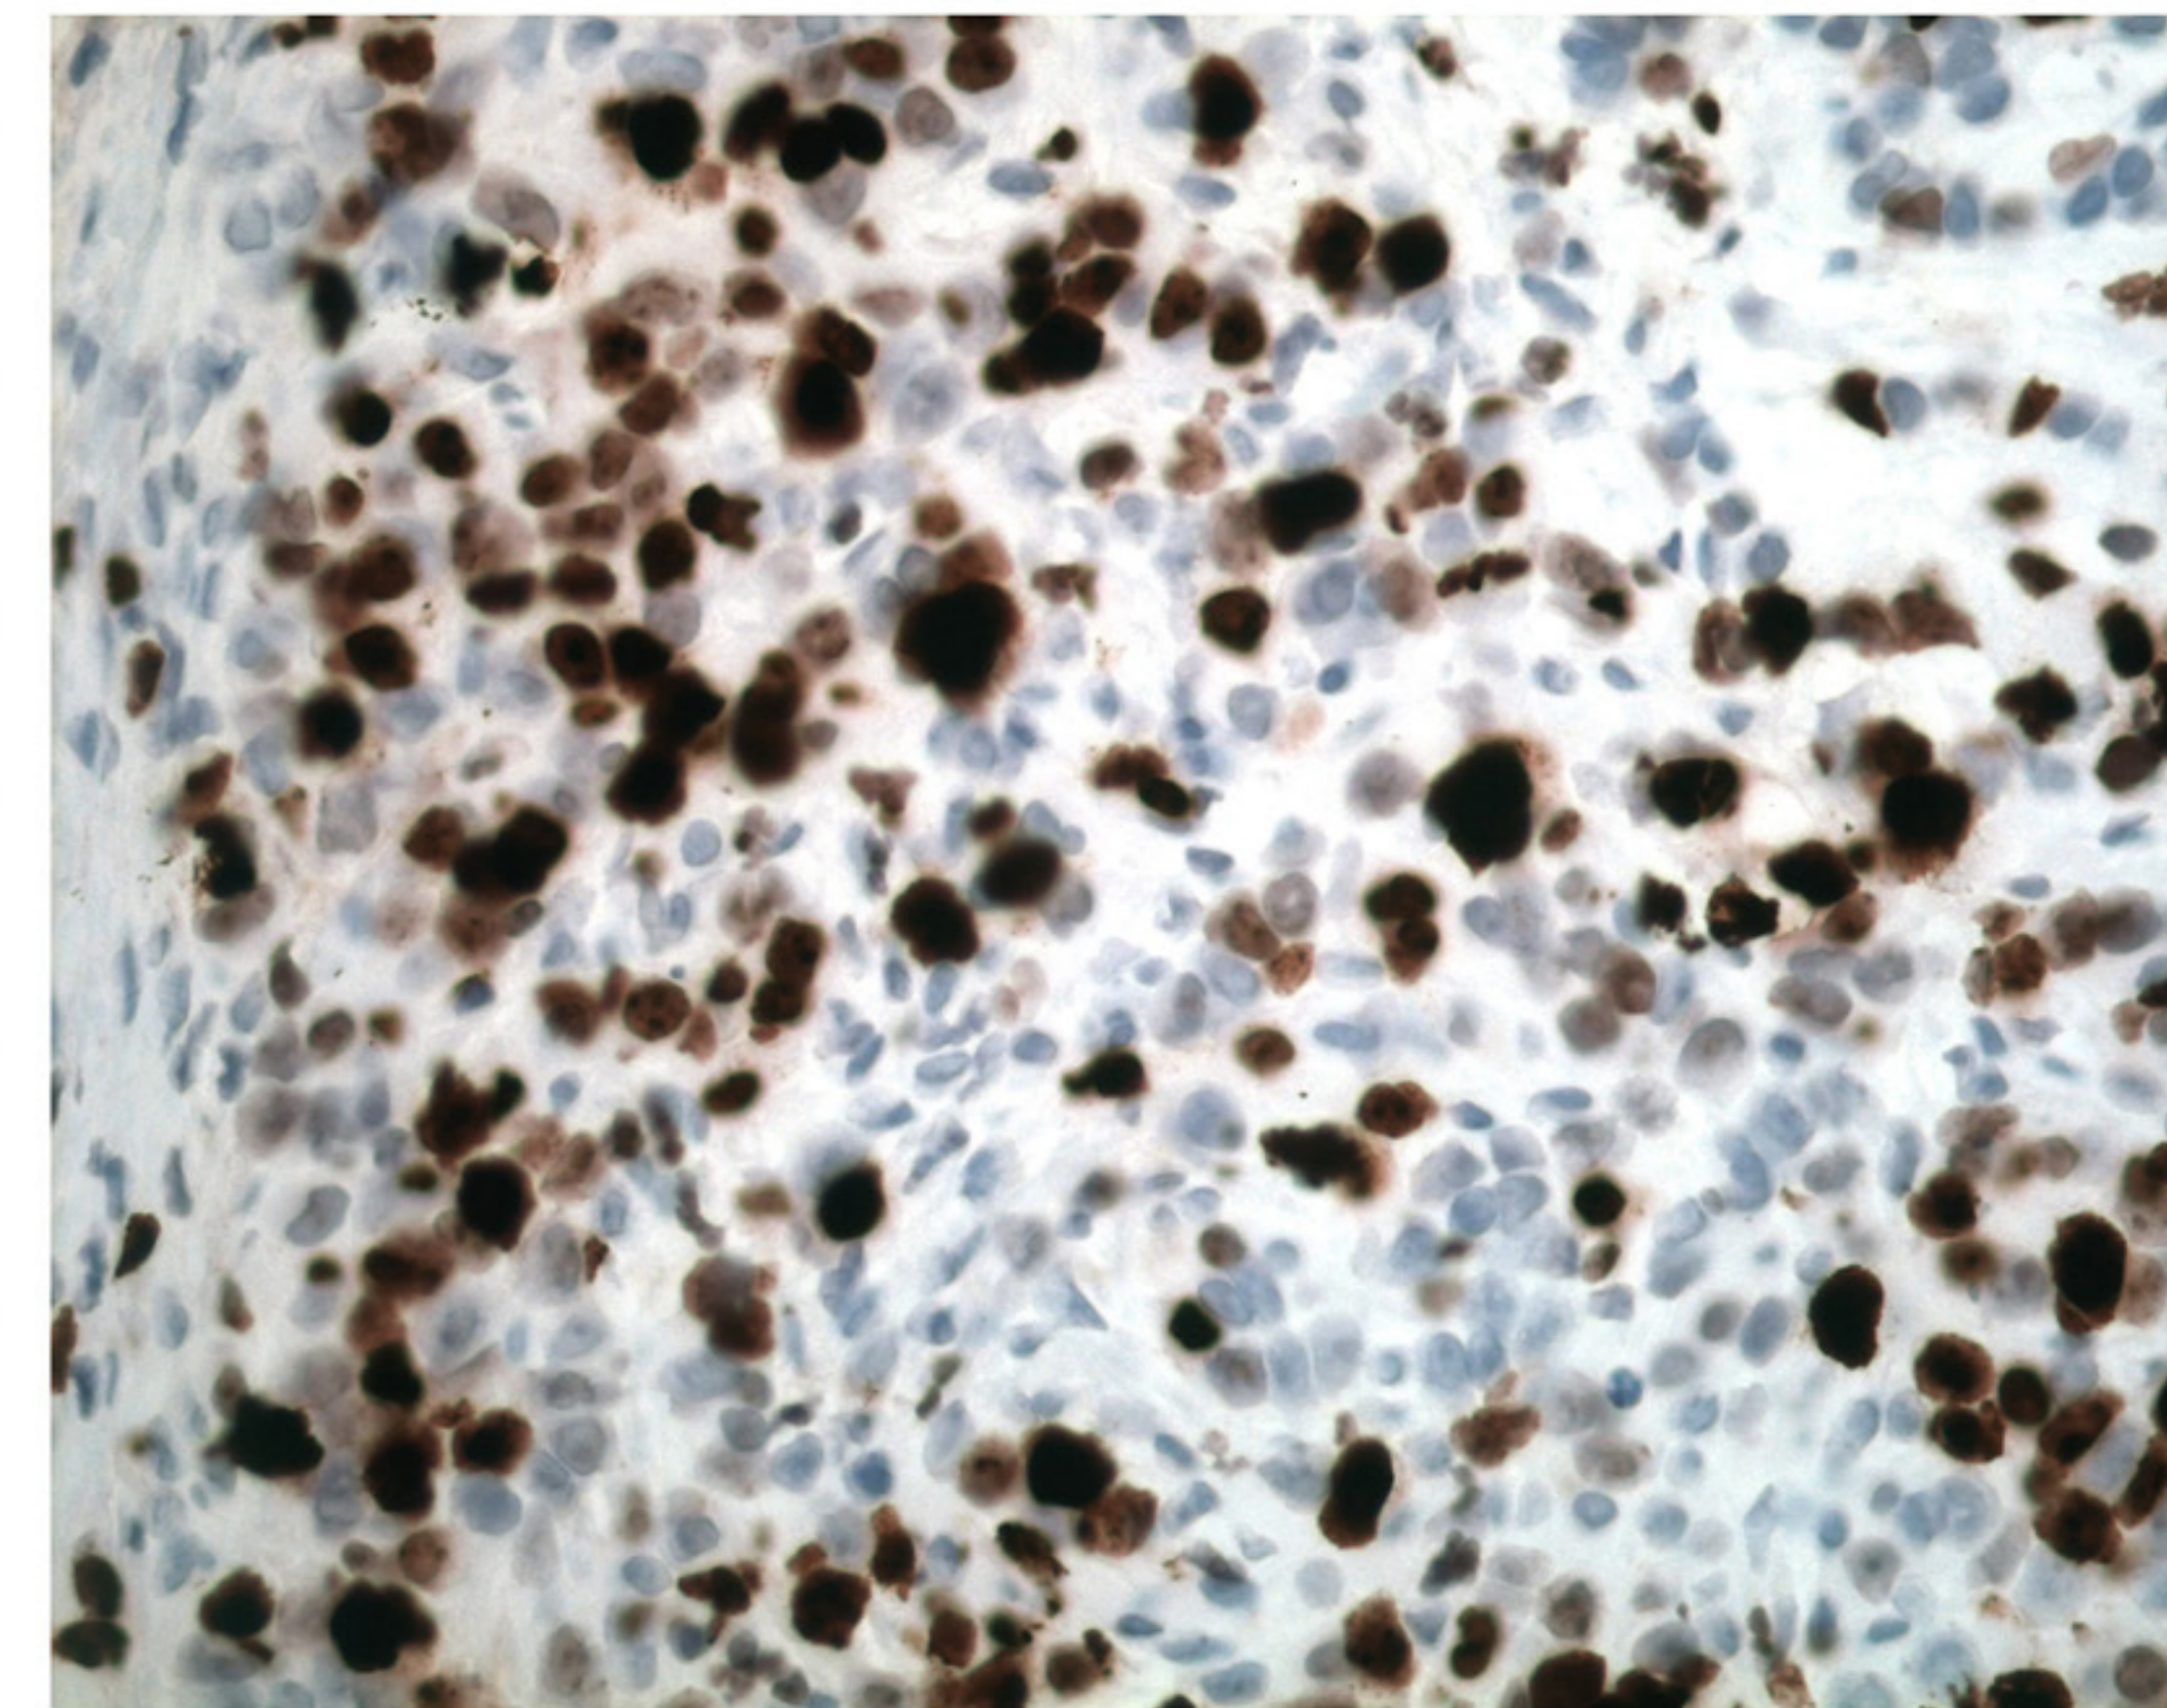

**vWF**

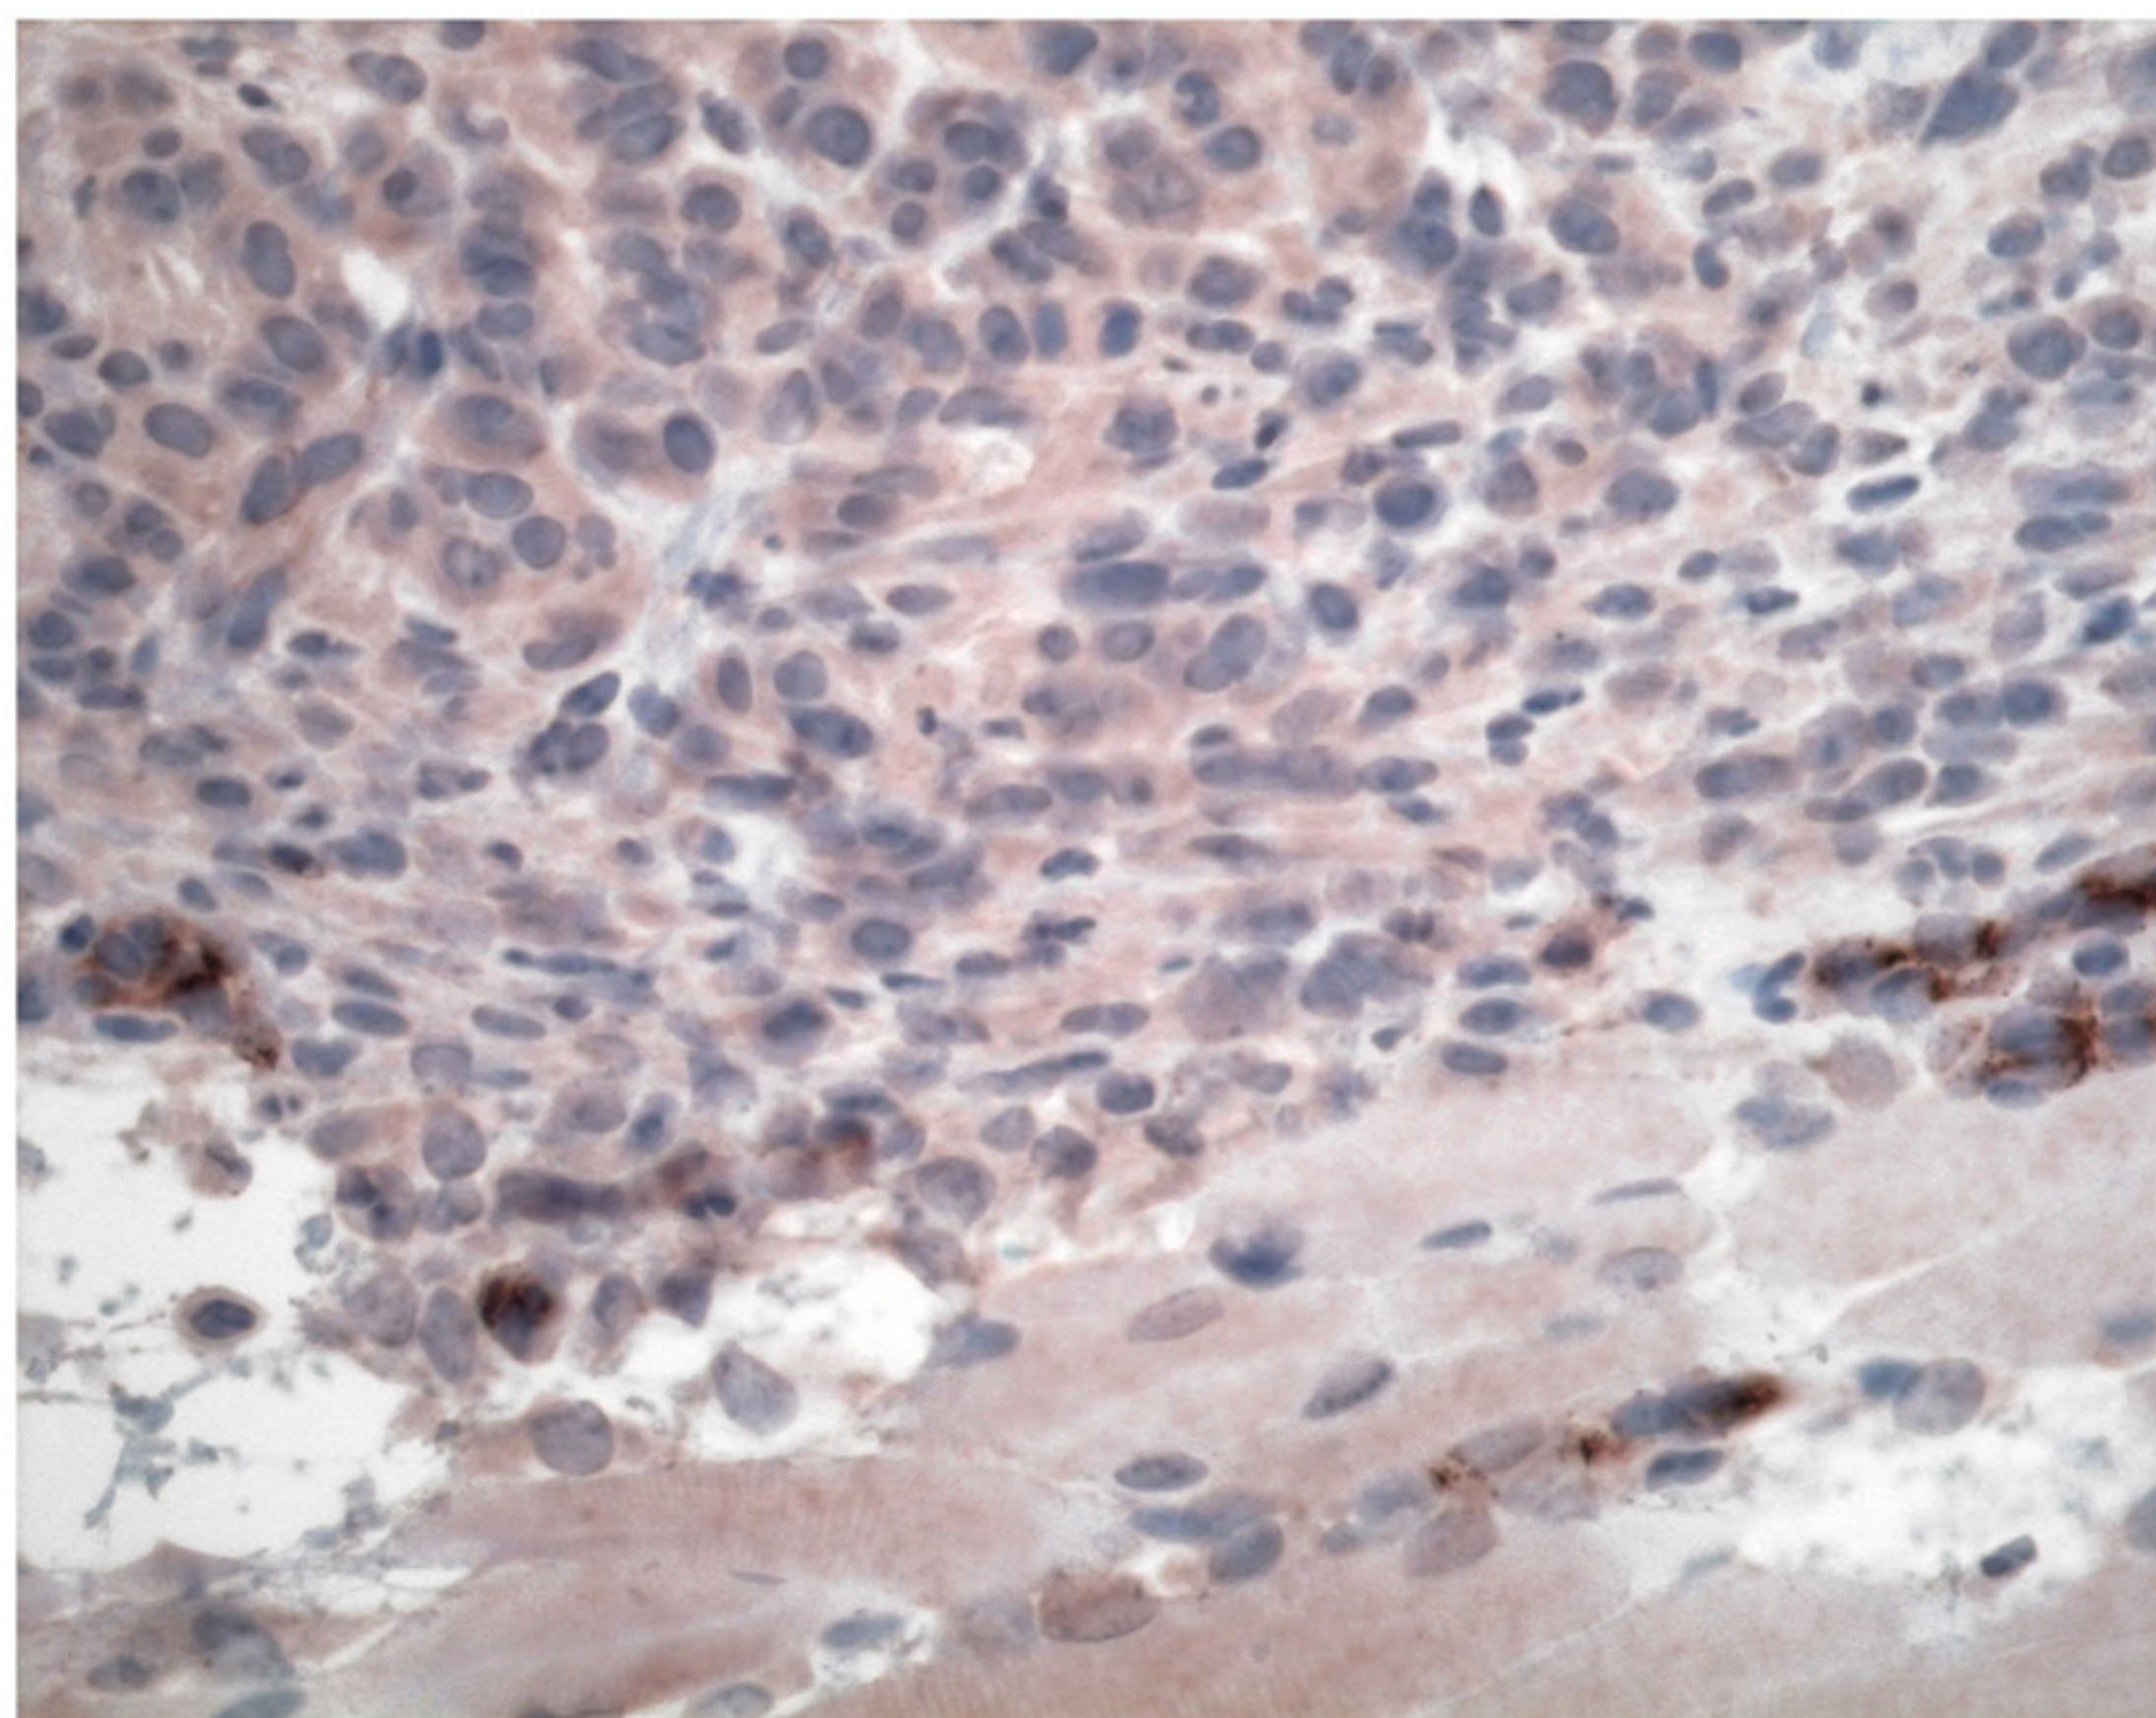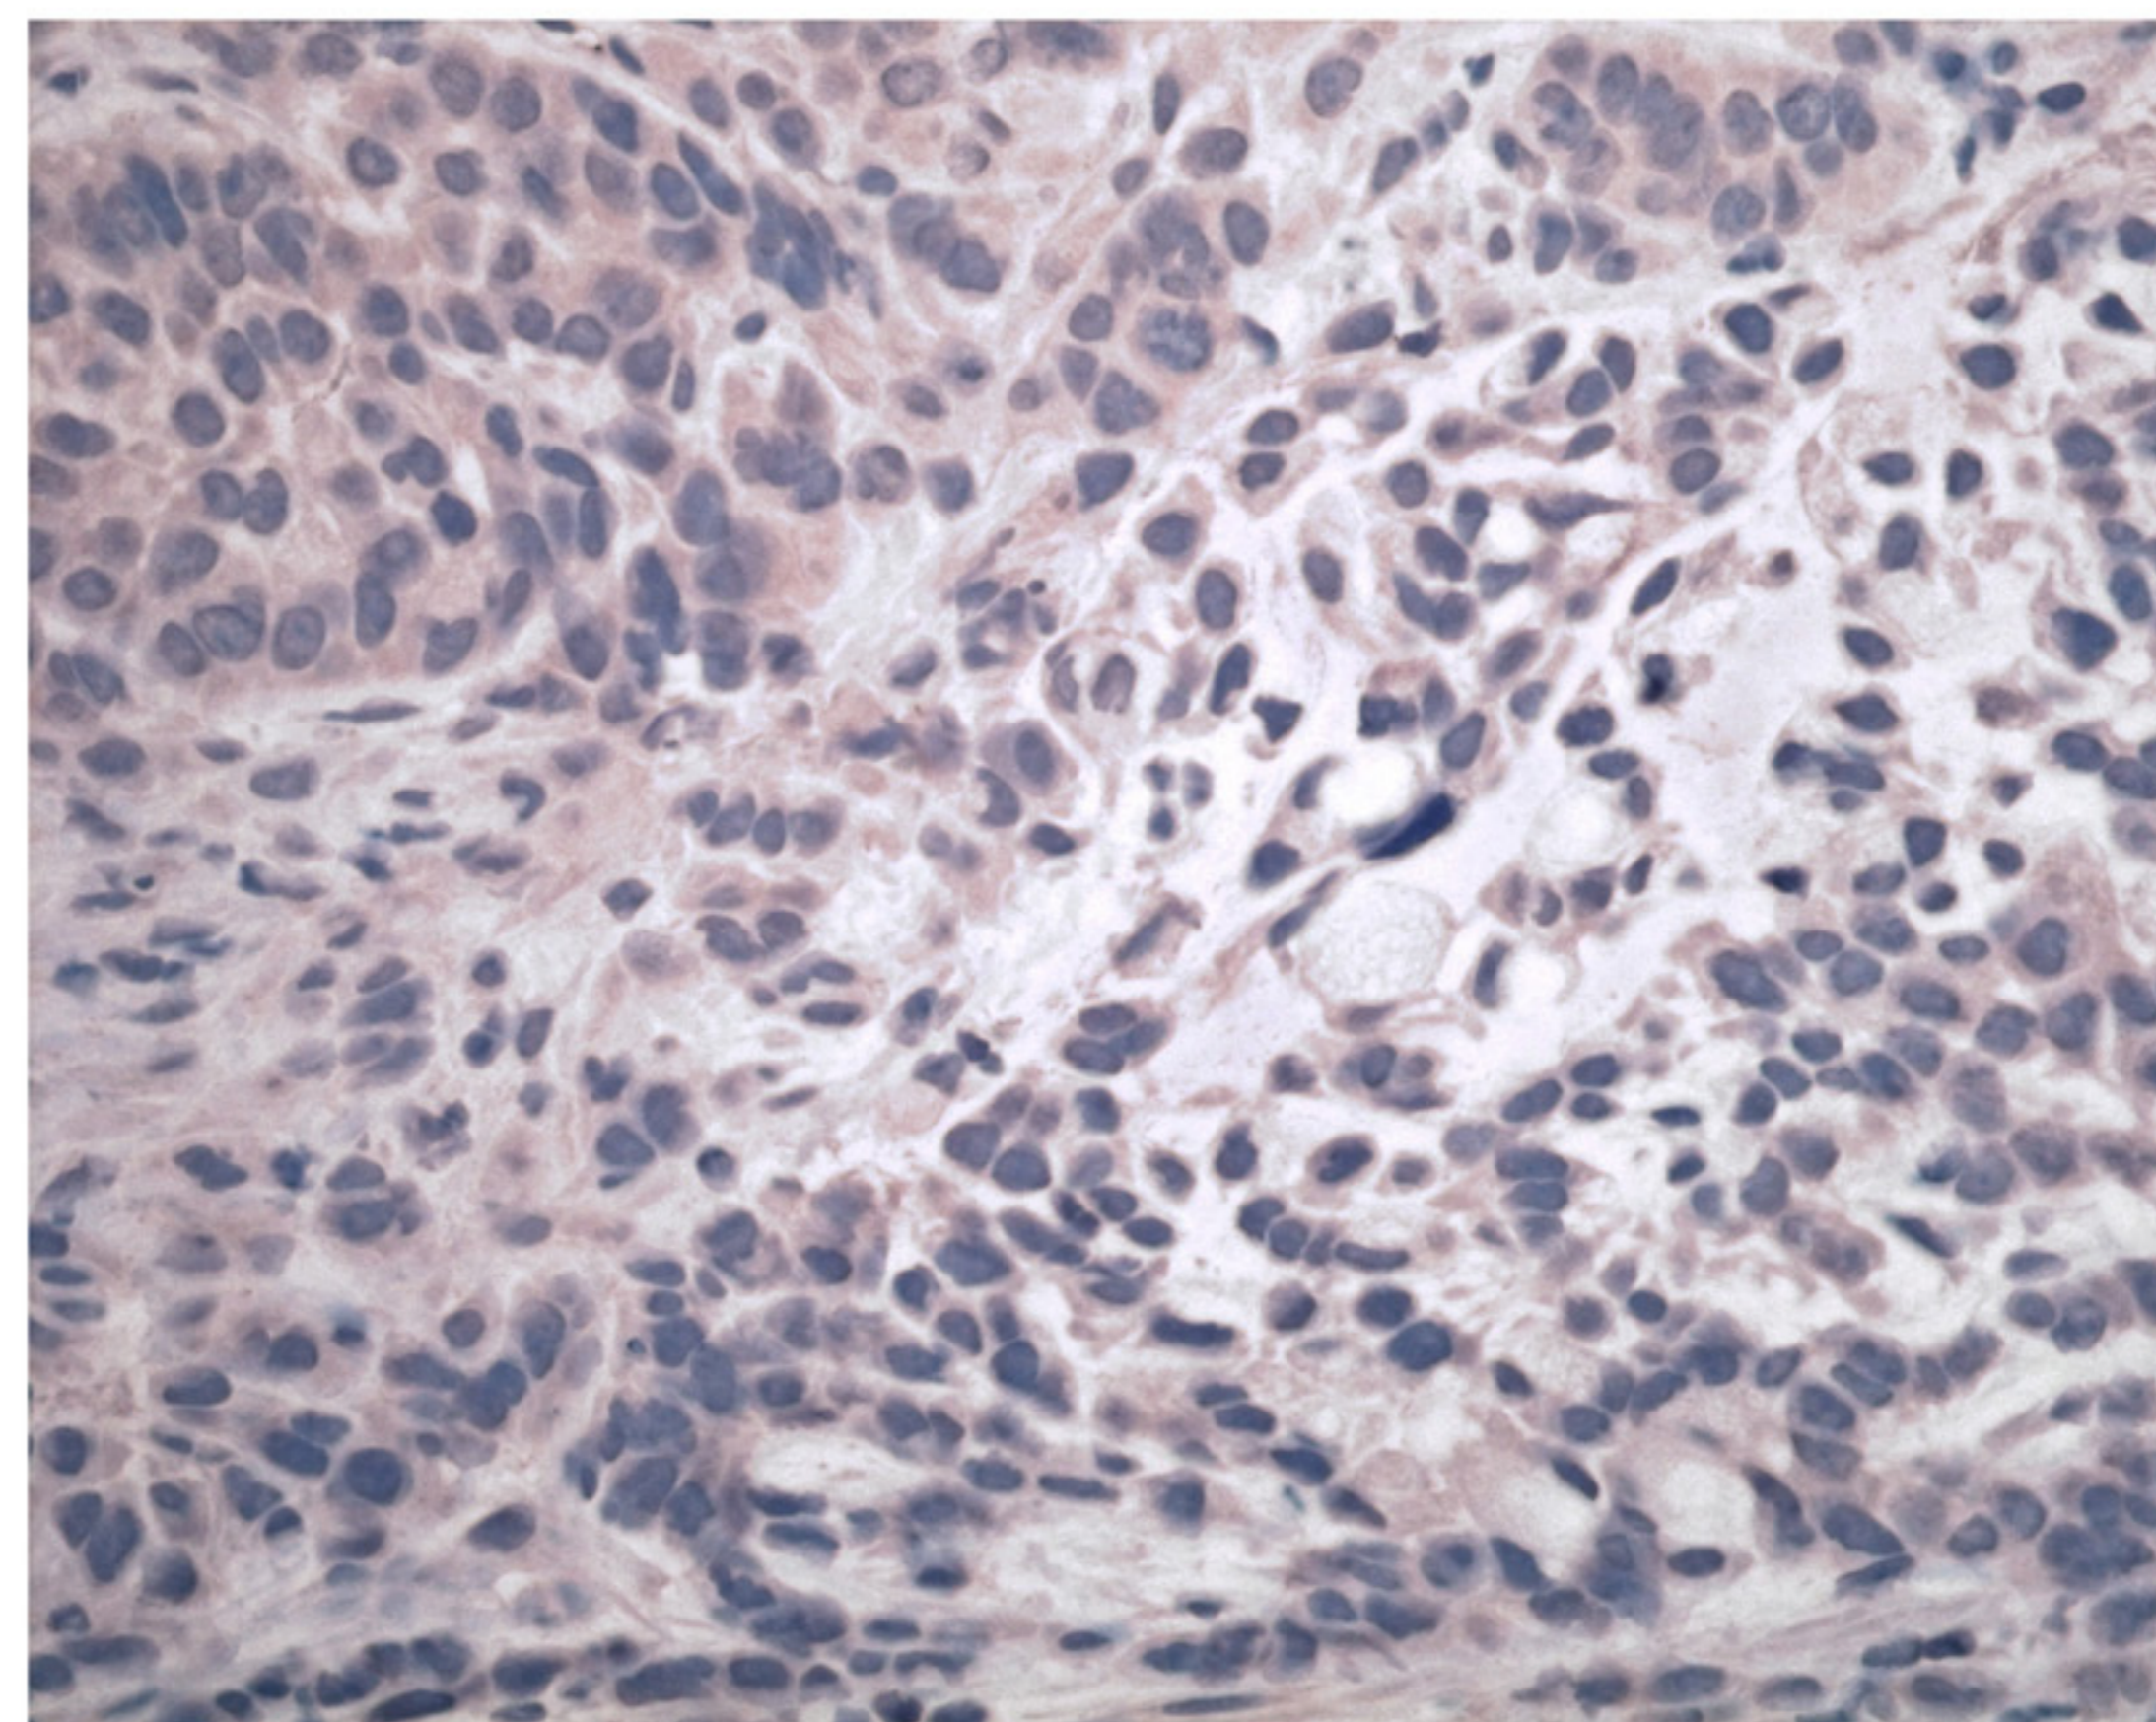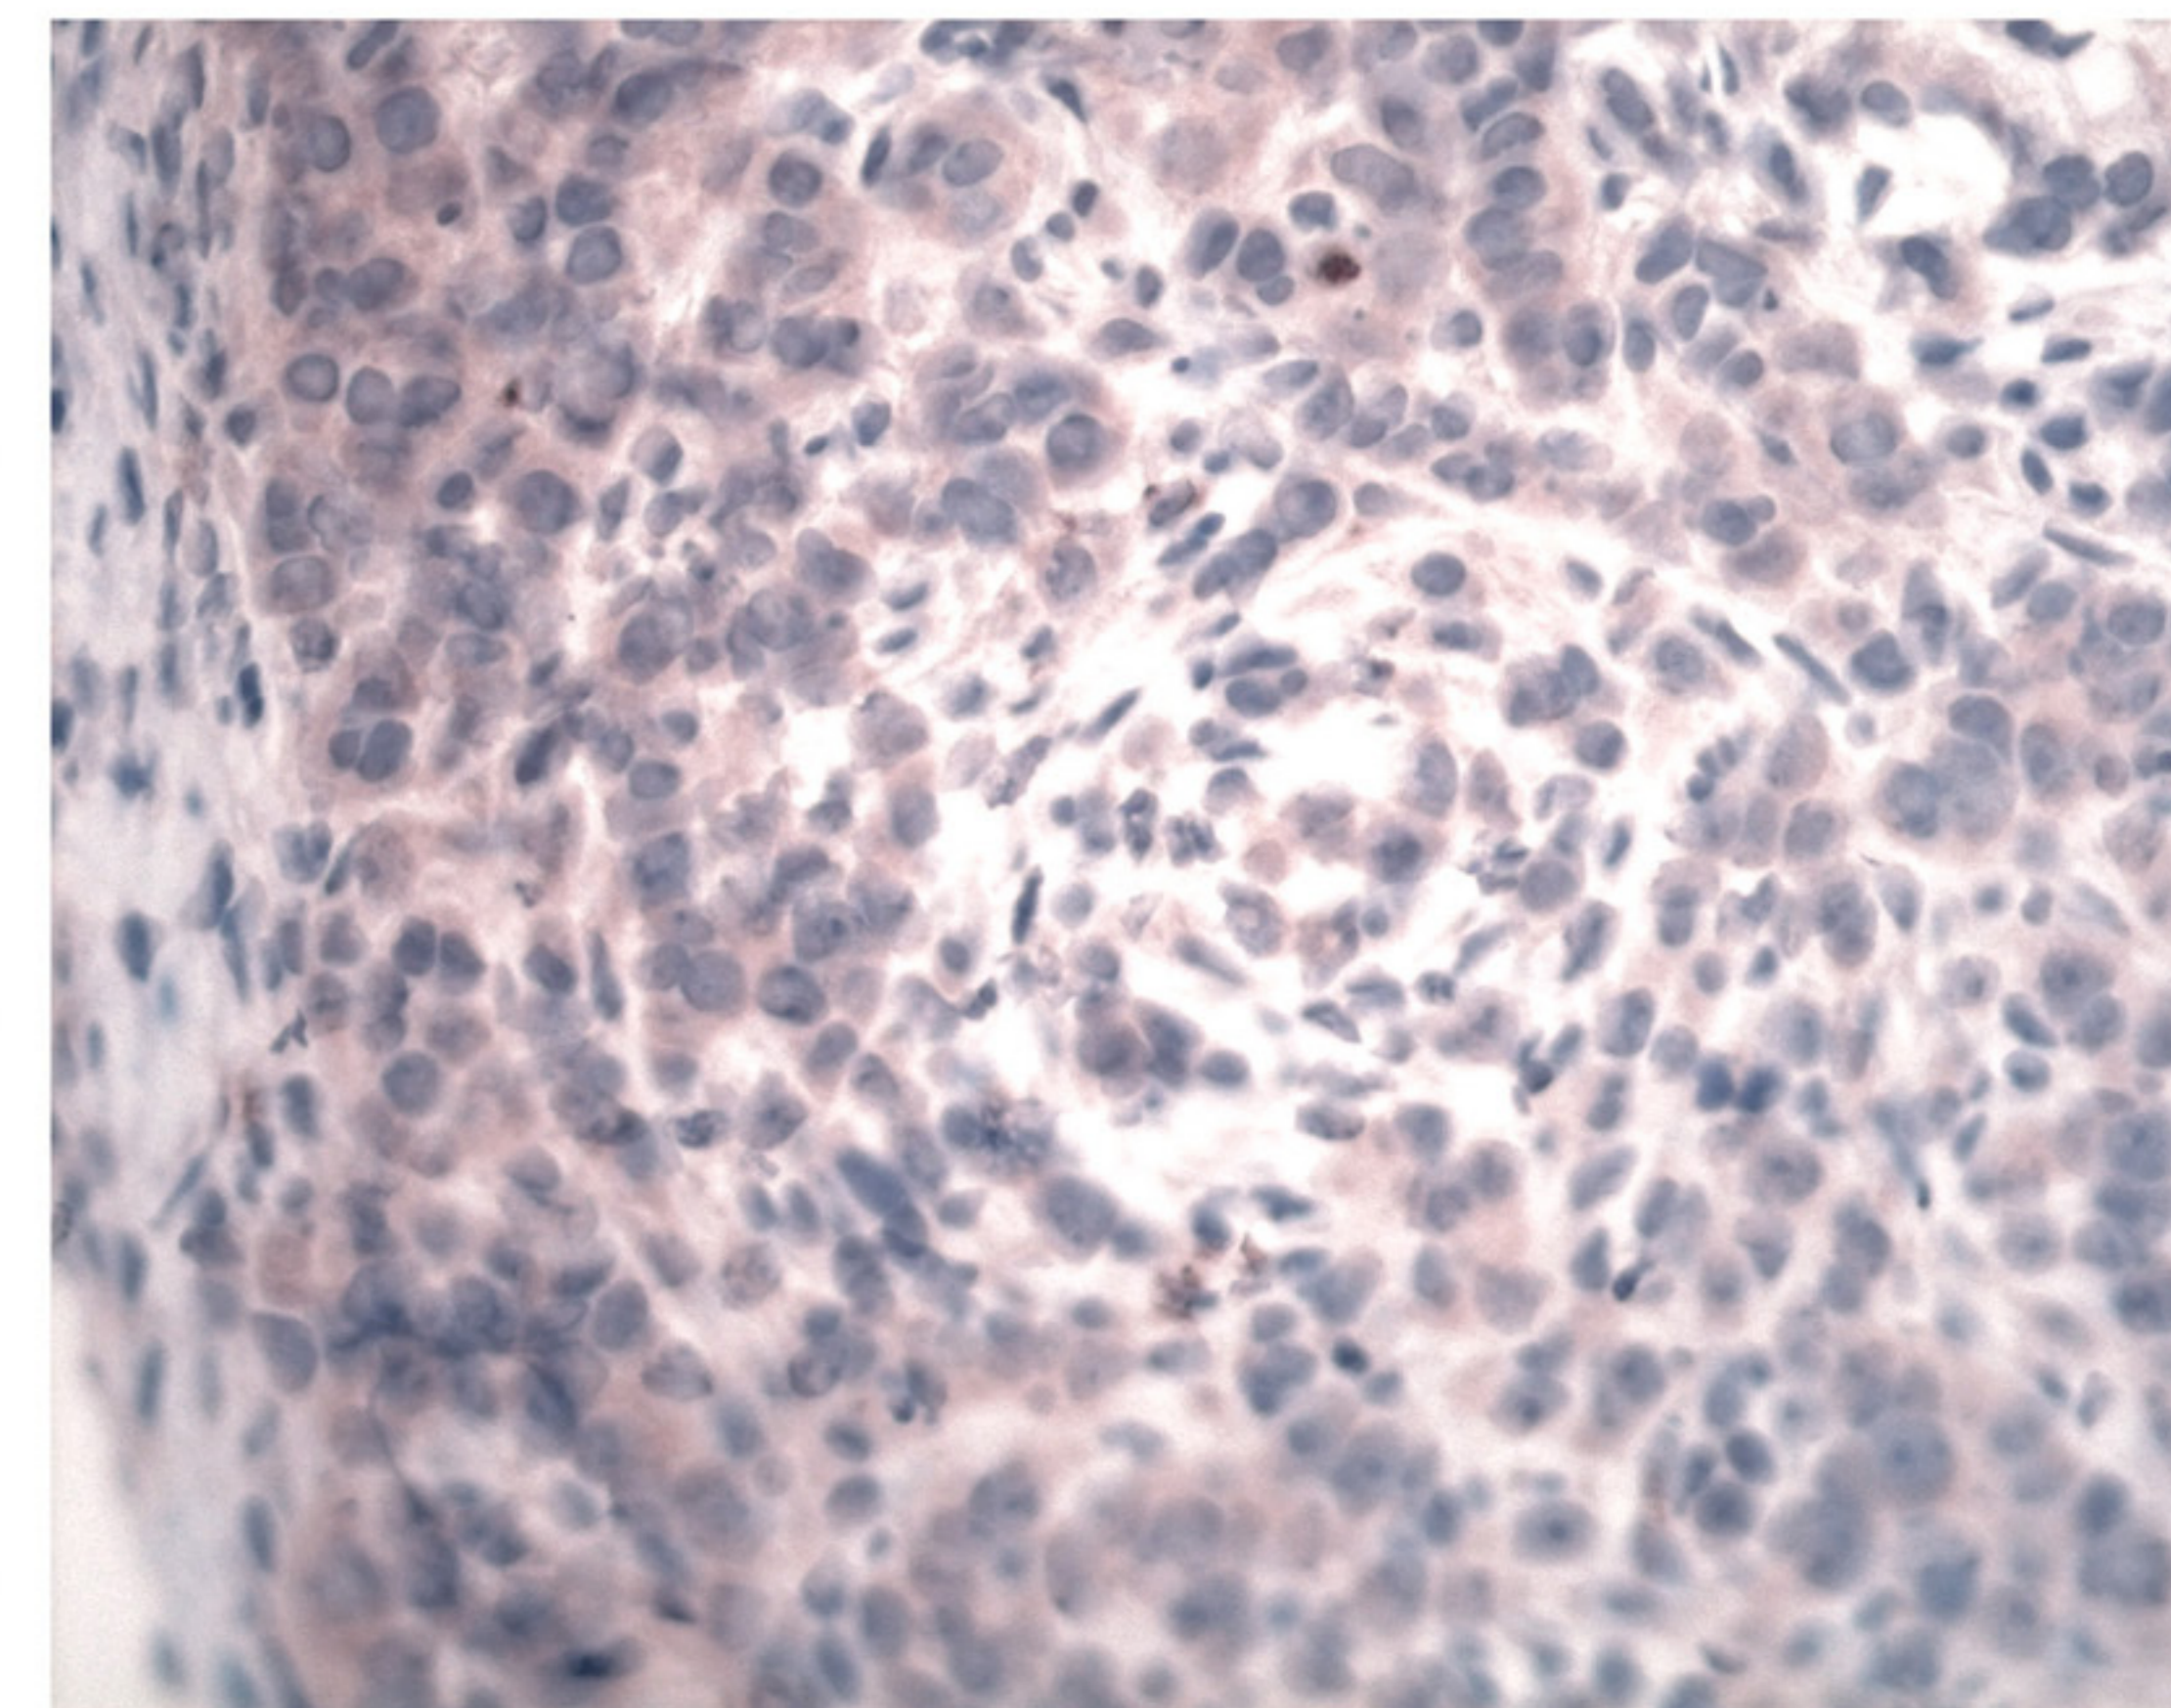

**400x**

**400x**

**400x**

Supplement: djn365_4.pdf [file djn365_4.pdf]
